1 **Reproducing extracellular matrix adverse remodelling of non-ST myocardial**  
2 **infarction in a large animal model**

3

4 Paolo Contessotto<sup>1</sup>, Renza Spelat<sup>1</sup>, Vaidas Vysockas<sup>2</sup>, Aušra Krivickienė<sup>3</sup>, Chunsheng  
5 Jin<sup>4</sup>, Sandrine Chantepie<sup>5</sup>, Clizia Chinello<sup>6</sup>, Audrys G. Pauza<sup>7</sup>, Mindaugas Rackauskas<sup>8</sup>,  
6 Vilma Zigmantaitė<sup>3</sup>, Fulvio Magni<sup>6</sup>, Dulce Papy-Garcia<sup>5</sup>, Niclas G. Karlsson<sup>4,9</sup>, Eglė  
7 Ereminienė<sup>3</sup>, Abhay Pandit<sup>1\*</sup>, Mark Da Costa<sup>1\*</sup>

8

9 <sup>1</sup> CÚRAM, SFI Research Centre for Medical Devices, National University of Ireland,  
10 Galway, Ireland

11 <sup>2</sup> LSMU Biological Research Center, Lithuanian University of Health Sciences, Kaunas,  
12 Lithuania

13 <sup>3</sup> Department of Cardiology, Medical Academy, Lithuanian University of Health Sciences,  
14 Kaunas, Lithuania

15 <sup>4</sup> Proteomics Core Facility at Sahlgrenska Academy, University of Gothenburg,  
16 Gothenburg, Sweden

17 <sup>5</sup> Laboratory Cell Growth, Tissue Repair and Regeneration (CRRET), University Paris Est  
18 Créteil, Créteil, France

19 <sup>6</sup> Clinical Proteomics and Metabolomics Unit, School of Medicine and Surgery, University  
20 of Milano-Bicocca, Veduggio al Lambro, Italy

21 <sup>7</sup> Lithuanian University of Health Sciences, Kaunas, Lithuania

22 <sup>8</sup> UF Health Heart and Vascular Hospital, Gainesville, FL, USA

23 <sup>9</sup> Section of Pharmacy, Department of Life Sciences and Health, Faculty of Health  
24 Sciences, Oslo Metropolitan University, Oslo, Norway

25

26 Corresponding authors:

27 [mark.dacosta@nuigalway.ie](mailto:mark.dacosta@nuigalway.ie)

28 [abhay.pandit@nuigalway.ie](mailto:abhay.pandit@nuigalway.ie)

29

30

31

32

33

34

35 **Abstract**

36

37 The rising incidence of non-ST-segment elevation myocardial infarction (NSTEMI) and  
38 associated long-term high mortality constitutes an urgent clinical issue. Unfortunately, the  
39 study of possible interventions to treat this pathology lacks a reproducible pre-clinical  
40 model. Indeed, currently adopted small and large animal models of MI mimic only full-  
41 thickness, ST-segment-elevation (STEMI) infarcts, and hence cater only for investigation  
42 into therapeutics and interventions directed at this subset of MI. Thus, we developed an  
43 ovine model of NSTEMI by ligating the myocardial muscle at precise intervals parallel to  
44 the left anterior descending coronary artery. After validating the presented model both by  
45 histology and functional analysis with clinical data, further omics analyses highlighted the  
46 distinctive features of post-NSTEMI tissue remodelling. Here, by looking at the  
47 transcriptome and proteome-derived pathways emerging at acute (7 days) and late (28  
48 days) post-surgery timepoints, we discovered specific alterations in cardiac post-ischaemic  
49 extracellular matrix (ECM). Together with the rise of well-known markers of inflammation  
50 and fibrosis, NSTEMI ischaemic regions showed distinctive patterns in the expression of  
51 complex N-glycans and glycosaminoglycans in cellular membranes and ECM. Identifying  
52 such changes in molecular moieties accessible to infusible and intra-myocardial injectable  
53 drugs sheds light on the development of targeted pharmacological solutions to contrast  
54 adverse fibrotic remodelling.

55

56 **Keywords**

57 Myocardial infarction, Preclinical model, ECM remodelling, Omics

58

59

60

61

62

63

64

65

66

67

68 Myocardial infarction (MI) belongs to the family of coronary artery diseases and is the  
69 leading cause of cardiovascular-related worldwide mortality<sup>1</sup>. In addition, COVID-19  
70 infection was recently shown to be an additional major risk factor in non-hospitalised  
71 cases<sup>2</sup>. Patients who survive an MI often suffer lethal heart failure later on. Indeed, heart  
72 failure appears to be an influential adverse prognostic factor after an MI<sup>3</sup>. A marked rise in  
73 non-ST-elevation myocardial infarctions (NSTEMIs) in hospitalised cases has emerged  
74 over the last two decades<sup>4,5</sup>. Moreover, despite the smaller cardiac ventricular areas  
75 affected by the ischaemic event, registry data show that NSTEMIs are associated with  
76 long-term mortality that is higher than that after ST-elevation myocardial infarctions  
77 (STEMIs)<sup>6-9</sup>.

78 In current preclinical studies MI is mainly reproduced as STEMI both in rodents (rats and  
79 murine) and large animals (porcine and ovine) by the ligation of the coronary arteries  
80 arising from the left coronary artery, specifically with an established preference for the  
81 ligation of the left anterior descending coronary artery (LAD)<sup>10,11</sup>. Nonetheless, ligation of  
82 the LAD results in an extended infarct in the left ventricle, associated with high  
83 experimental mortality and a poor reflection of most hospitalised clinical cases. Indeed,  
84 most MIs currently reported in the clinics are either partial or non-transmural infarcts, and  
85 often involve multiple small regions of the left ventricle<sup>5,12</sup>. Only a few studies have paved  
86 the way by optimising the extension of the infarct up to approximately 25% of the infarct's  
87 left ventricular mass and bringing the overall experimental mortality down to around  
88 17%<sup>13,14</sup>. Therefore, there is a clear need in the field to adopt validated, clinically similar  
89 models to evaluate NSTEMI pathophysiology and possible interventions fully.

90  
91 In all the previously adopted preclinical models of MI, collagen deposition in the myocardial  
92 left ventricular wall concludes the process which starts with the ischaemic insult. Fibrosis  
93 compensates, albeit poorly, for the extensive loss of cardiomyocytes<sup>15</sup>. Indeed, the entire  
94 post-infarction process begins with a sterile immunological response involving different  
95 populations of macrophages and inflammatory cells that have only recently been  
96 characterised by single-cell RNA sequencing<sup>16,17</sup>. Significantly, post-ischaemic myocardial  
97 remodelling disrupts the initial balance of glycosaminoglycans (GAGs), proteoglycans and  
98 glycans which are present in the extracellular matrix (ECM) and cell membrane of cardiac  
99 cell populations (cardiomyocytes, fibroblasts, endothelial cells)<sup>18,19</sup>. Consequently, adverse  
100 remodelling affects the structural and mechanical stability of the ECM environment. This  
101 also leads to imbalances in molecular pathways that include the recruitment of growth

102 factors such as vascular endothelial growth factor (VEGF), platelet-derived growth factor  
103 (PDGF) and fibroblast growth factor (FGF). Most studies on MI are performed by  
104 reproducing full-thickness STEMIs in mice and rodents, and this is an obvious limitation in  
105 their translation to humans. Large animals, specifically sheep, have been extensively used  
106 to evaluate the recovery of heart functionality following STEMI because of the similarity in  
107 the organ volume with that in humans<sup>20,21</sup>.

108 In the proposed ovine model of NSTEMI we have analysed the molecular and histological  
109 features both at an acute (7 days) timepoint during repair and healing, and a late (28 days)  
110 timepoint post-MI. Indeed, given the key role of the modulation of post-ischaemic cardiac  
111 ECM in developing translational therapies and the lack of an established animal model  
112 that mimics partial thickness myocardial infarction, we felt that a clinically relevant  
113 translational model of NSTEMI was urgently needed in the cardiovascular field<sup>4,22,23</sup>. Once  
114 we established a surgical procedure to achieve clinically similar NSTEMIs in sheep, we  
115 investigated the ischaemic, border zone and remote regions at early (7 days) and late (28  
116 days) timepoints post-MI by histology, RNA-sequencing, proteomics and glycomics. We  
117 hope that the proposed NSTEMI model would inspire specific translational options to  
118 target this world-wide increasing pathology.

119

120

## 121 **Results**

122

### 123 **Stable functional impairment in a clinically relevant ovine model of NSTEMI**

124 Current preclinical models of full-thickness infarcts (STEMIs) are based on the ligation of  
125 the LAD or variations of this procedure in the LAD territory<sup>10,24</sup>. A significant limitation of  
126 the LAD ligation model in its clinical resemblance is that proximal occlusion of the coronary  
127 is often fatal. Indeed, the incidence of NSTEMIs currently exceeds the number of actual  
128 clinical infarcts that LAD ligation-based models aim to reproduce<sup>22,25,26</sup>. In this study,  
129 multiple ligations were performed lateral and parallel to the LAD from the first diagonal up  
130 to 3-4 cm from the apex to induce multiple non-transmural infarcts in the left ventricle (Fig.  
131 1a,b and Extended Data Fig. 1). The proposed model of NSTEMI was performed in a  
132 cohort of 21 sheep. Four sheep died during the surgical procedure, resulting in an overall  
133 mortality of 19.04%. Vagus nerve stimulation during intubation caused two deaths, one  
134 was due to left ventricle rupture and one of uncertain cause at the premedication stage.  
135 Thus, only one sheep died from the actual MI, specifically from a complication of the

136 induced MI. Six sheep were sacrificed on day 7 (d7) post-MI and the remaining eleven on  
137 day 28 (d28) post-NSTEMI as the final endpoint to evaluate both functional and  
138 histological alterations.

139 Full-thickness infarcts induce marked drops in ejection fraction (EF)<sup>27,28</sup>. In contrast, the  
140 current NSTEMI model causes focal infarcts, associated with a limited yet significant  
141 reduction in EF ( $8.52 \pm 7.88\%$ ,  $P=0.03$ ) on d7 post-surgery (Fig. 1c). Three weeks later  
142 (d28), EF decreased by  $10 \pm 8.31\%$  ( $P=0.009$ ) relative to the pre-MI levels (Fig. 1c). Post-  
143 ischaemic remodelling involves different degrees of dilatation, hypertrophy and finally  
144 collagen scarring. This process occurs over weeks and months and it is influenced by  
145 multiple factors including the size and site of the infarct, whether the infarct was transmural  
146 (STEMI) or not (NSTEMI), the amount of stunning of the peri-infarct myocardium, the  
147 patency of the related coronary artery and local trophic factors<sup>29,30</sup>. Since NSTEMI is not  
148 the result of complete occlusion of a coronary artery, it usually affects a small area or  
149 those that are diffuse or patchy areas of the ventricular muscle rather than the entire  
150 thickness of the local ventricular wall. Indeed, the presented model did not significantly  
151 vary in left ventricular diastolic and systolic diameters (LVEDD and LVESD) (Fig. 1c).  
152 Therefore, to further evaluate the functional impairment seen in the proposed NSTEMI  
153 model, we analysed the loss of cardiac contractility in the specific left ventricular segments  
154 affected by NSTEMI through regional wall motion index (WMI) analysis (Fig. 1d). On d7  
155 post-NSTEMI wall motion impairments were significant in basal anterior/anteroseptum,  
156 ( $WMI=1.73 \pm 0.56$  and  $1.82 \pm 0.6$ ,  $P<0.001$ ), mid anteroseptum/anterior ( $WMI=1.82 \pm 0.6$  and  
157  $2.14 \pm 0.45$ ,  $P<0.001$ ), apical anterior ( $WMI=1.64 \pm 0.64$ ,  $P<0.001$ ), and apical septum  
158 ( $WMI=1.41 \pm 0.58$ ,  $P<0.05$ ) segments. This widespread wall-motion deficit persisted in all  
159 the affected segments on d28 post-NSTEMI (Fig. 1d).

160 To validate the current NSTEMI induction with clinical data, electrocardiograms (ECGs)  
161 post-ligation highlighted comparable changes in T wave inversion in leads I, II, III and aVF  
162 (Fig. 1e and Extended Data Fig. 2). In line with presented data on LVEDD and LVESD, the  
163 reduction in fractional shortening (FS) was not significant on d7 and d28 post-surgery  
164 (Extended Data Fig. 3a). In addition, we measured a significant rise in troponin I serum  
165 levels on day 1 and 2 post-NSTEMI induction (Extended Data Fig. 3b). This data further  
166 supports the required criteria to define the current model as representative of an  
167 NSTEMI<sup>31</sup>.

168

169 **Ischaemic damage and consequent adverse remodelling following NSTEMI**

170 The non-transmural nature of the induced NSTEMI infarcts became apparent with  
171 explantation on d28 post-MI (Fig. 1b). During the surgical procedure, the localisation of the  
172 infarct was defined by its proximity to the blue suture used to perform the multiple ligations  
173 (Extended Data Fig. 1b-f). Indeed, once the hearts were sliced at a thickness of 1 cm, the  
174 NSTEMI regions were detectable by the discolouration of the left ventricular wall (Fig. 1b).  
175 Therefore, sampling was carried out from the core ischaemic progressively to the border  
176 and remote regions (Extended Data Fig. 3c). Specimens were isotropically uniformly  
177 oriented to avoid any bias when evaluating cardiomyocytes and vasculature structures<sup>32</sup>.  
178 It is well known that the necrotic phase responsible for the loss of cardiomyocytes in the  
179 left ventricle and the consequent highly pro-inflammatory microenvironment represents the  
180 first immediate steps post-ischaemia<sup>33</sup>. Moreover, a valid model of MI also needs to  
181 reproduce the long-term effects on the border zone regions indirectly affected by the  
182 complete tissue disruption in the ischaemic core<sup>34,35</sup>. This study detected a progressive  
183 vacuolisation inside the cardiomyocytes from d7 to d28 after NSTEMI induction (Fig. 2a).  
184 Disruption of the intercalated disks and lipid droplet accumulation (Fig. 2a and Extended  
185 Data Fig. 3d) were seen exclusively in the acute phase (d7). In contrast, fibrotic deposition  
186 fully developed at the endpoint (d28) of the study (Fig. 2a,b and Extended Data Fig. 3d).  
187 Specifically, intercalated disk disruption highlighted the structural disassembly of the  
188 cardiomyocyte myofibril apparatus needed for its cellular contraction and thus the  
189 synchronous beating of the whole organ. In addition, the accumulation of dense bodies in  
190 the mitochondria of these cardiomyocytes further supported the evidence of ischaemic  
191 injury (Fig. 2c). Together, these data show that the current model of NSTEMI reproduced  
192 the sequential inflammatory and fibrotic remodelling of the infarcted region, resulting in a  
193 non-full-thickness scar formation which is characteristic of the clinical cases of NSTEMI.  
194 Histology showed the extended loss of cardiomyocytes from the ischaemic core to the  
195 border zone on d7 post-NSTEMI induction (Fig. 2b). From the end of the first week after MI  
196 and through the following weeks the myofibroblasts secrete collagen<sup>36</sup>, and this event was  
197 also observed in the current model (Fig. 2b,d). Moreover, an irregular vascularisation in  
198 the fibrotic areas was detected by immunostaining for  $\alpha$ -SMA<sup>+</sup> arterioles. (Fig. 2d).

199

## 200 **Transcriptome and proteome of NSTEMI infarcts**

201 To investigate the molecular profiling of the current model of NSTEMI, we analysed the  
202 transcriptome and proteome of the ischaemic core, border, and remote region. Bulk RNA-  
203 sequencing analysis (adjusted p value of 0.05, mean quality score 38.41) highlighted pools

204 of differentially expressed genes (DEG) at each timepoint post-ligation, depending on the  
205 distance from the ischaemic core (Fig. 3a). A clear regional- and temporal-dependent  
206 transcriptome alteration was seen on the ischaemic core, border and remote regions (Fig.  
207 3a and Extended Data Fig. 4). Specifically, 1079 transcripts were upregulated ( $\log_2\text{Fold-change} > 1.5$ ) and 805 downregulated ( $\log_2\text{Fold-change} < 1.5$ ) in the ischaemic core on d7  
208 compared to d28 post-NSTEMI (Fig. 3a). Moreover, in the border zone 1855 transcripts  
209 were upregulated and 667 downregulated, and finally in the remote region 284 were  
210 increased and 233 decreased on d7 compared to d28 post-surgery (Fig. 3a and Extended  
211 Data Fig. 4).  
212

213 DEG data derived from infarcted tissues on d7 and 28 vs healthy samples were analysed  
214 by Ingenuity Pathway Analysis (IPA<sup>®</sup>) to identify which canonical pathways are significantly  
215 altered following NSTEMI. Many typical pathways associated with myocardial ischaemic  
216 pathophysiology were detected, such as fibrosis and atherosclerotic, renin-angiotensin  
217 signalling both on d7 and 28 post-surgery (Fig. 3b). In addition, several pathways linked to  
218 the inflammatory response emerged in the d7 post-NSTEMI group, including hypoxia-  
219 inducible factor (HIF1 $\alpha$ ), endothelial NOS (eNOS), and interleukin-6 (IL-6), -9, -10, -12,  
220 leukocyte extravasation and inflammasome signalling (Fig. 3b). On d7 and d28 post-  
221 NSTEMI biological functions linked to inflammatory cell recruitment ranked as the top  
222 activated ones (z-score above 10) (Fig. 3c). Indeed, pathway analysis on DEG associated  
223 with higher HIF1 $\alpha$  expression predicted the activation of inflammatory markers such as IL-  
224 1 $\beta$ , IL-6, and tumour necrosis factor (TNF) on d7 (Extended Data Fig. 5a). HIF1 $\alpha$  was also  
225 associated with the predicted activation of fibrotic molecular profiling such as transforming  
226 growth factor- $\beta$  (TGF- $\beta$ ), matrix metalloproteinase-2 and -9 (MMP-2, -9) and lysyl oxidase  
227 (LOX) on d28 in the ischaemic core (Extended Data Fig. 5b).

228 Proteomic analysis was run to validate further the molecular changes seen by RNA-seq  
229 and pathway analysis showing a post-ischaemic remodelling response. In line with the  
230 RNA-seq outcome, pathway analysis on proteomic data showed significant activation of  
231 IL1- $\beta$ , TNF, IL-6, TGF- $\beta$ , IFN- $\gamma$  in the ischaemic core 28 days post-NSTEMI (Extended  
232 Data Table 1). In addition, LC-ESI-MS/MS data from whole extracts of ischaemic core,  
233 border, and remote regions (false discovery rate below 1%) highlighted well-known  
234 markers of fibrotic replacement (Fig. 3d). Interestingly, a progressively increased calponin  
235 1 and vimentin expression was seen from the remote to the ischaemic core regions both  
236 on d7 and d28 post-NSTEMI (Fig. 3d). Specifically, when compared with the healthy left  
237 ventricular myocardial sample, vimentin ratio increased to 9.13-fold and 11.37-fold on d7

238 and to 5.58-fold and 10.10-fold on d28 in the border and ischaemic core regions,  
239 respectively. Also, the calponin-1 ratio increased to 1.87-fold and 2.5-fold on d7 and to  
240 1.5-fold and 5.28-fold on d28 in the border and ischaemic core regions, respectively (Fig.  
241 3d). Moreover, gene-annotation enrichment analysis using Database for Annotation,  
242 Visualization, and Integrated Discovery (DAVID) software on RNA-seq data highlighted  
243 glycan alterations in the post-ischaemic remodelling in the current NSTEMI model  
244 (Extended Data Fig. 6). Both on d7 post-surgery N-glycan biosynthesis (Extended Data  
245 Fig. 6a) and on d28 post-surgery glycosaminoglycans (GAGs) biosynthesis (Extended  
246 Data Fig. 6b) emerged among the biological categories (KEGG pathways) with the highest  
247 enrichment score. As the relevance of glycoproteins in the pathophysiology of MI has  
248 raised increasing interest in recent years<sup>18,37</sup>, we have expanded this finding through  
249 advanced glycomics on N-linked glycans extracted from the cellular membrane and ECM  
250 proteins in ischaemic, border and remote regions.

251

### 252 **Distinct glycoprofile in the ischaemic tissue following NSTEMI**

253 Considering the findings highlighted by the functional annotation analysis on RNA-seq  
254 data, we scrutinised the altered glycan composition in the cellular membrane and ECM  
255 proteins of infarcted NSTEMI tissue. Here, we dissected the glycome under the  
256 inflammatory (d7) and fibrotic (d28) conditions following NSTEMI by advanced glycomic  
257 analysis of the N-glycans expressed in the left ventricular membrane and ECM protein  
258 fraction. To achieve this, during the sample processing N-linked glycans were released  
259 and analysed by LC-MS. Following annotation procedures, 103 putative N-glycan  
260 structures were identified, including 10 high mannose, 15 hybrid and 78 complex-type  
261 glycans (Fig. 4). Since the relative abundance of these structures varied across healthy  
262 and infarcted tissues, hierarchical clustering analysis was performed for each N-linked  
263 glycan subgroup. (Fig. 4a-e). High-mannose N-linked glycans clustering reflected the main  
264 distinctions among ischaemic core (IS), border (BZ) and remote regions (F) (Fig. 4a). The  
265 subgroup consisting of high mannose N-glycans in the healthy myocardium and F regions  
266 showed a global similarity of only 38% to IS on d7 and d28 high mannose N-glycans  
267 (based on distribution found by MS) (Fig. 4a). This is in contrast to the post-NSTEMI (d7  
268 and d28), where IS regions showed a global 76% similarity in high mannose N-glycans  
269 when grouped. The difference in the level of high mannose glycans showed some  
270 interesting features at d7 and d28 post-NSTEMI depending on the distance from the IS  
271 region (Fig. 4b). In IS, high mannose structures decreased to 21-24% compared to healthy



272 (HLT) tissue (32%) both on d7 and d28. At the same time, the remote (F) area appeared  
273 not to be effected as judged by the similarity in expression compared to healthy. The  
274 border zone (BZ) also appeared to be affected by a decrease in high mannose at the early  
275 timepoint (d7), but recovered after 28 days, to 38%, a level similar to those of healthy  
276 (32%) and less effected remote areas (F) (32-34%) (Fig. 4b).

277

278 The opposite effect, consistent with the trends of the high mannose structure, was seen in  
279 complex N-glycans. Indeed, the level of complex N-glycans detected in IS regions on d7  
280 and d28 had a limited similarity (39%) with healthy myocardium (Fig. 4c,d). Ischaemic core  
281 regions clustered together both on d7 and d28, and hence showed no signs to recover due  
282 to time, with a low (48%) similarity with the less effected remote ones (F) (Fig. 4c). Starting  
283 from d7, both in IS and BZ the level of complex glycans was increased (71%) compared to  
284 those of healthy and less effected F areas (55%) (Fig. 4d), until d28 in IS (75%). Finally, in  
285 IS regions hybrid N-glycan expression decreased to 4-5% from the initial 13% in healthy  
286 (Fig. 4e).

287

288 Sialylation is a well-known glycosylation type present across cardiac cellular populations  
289 such as cardiomyocytes and endothelial cells<sup>18,38</sup>. Given the observed increase in complex  
290 N-glycans post-NSTEMI (Fig. 4c,d), we aimed to analyse alterations in sialylated complex  
291 N-glycans structures (Fig. 4f). Therefore, we focused on potential differences in the  
292 abundance of sialic acid types such as neuraminic acid (NeuAc) and N-glycolylneuraminic  
293 acid (NeuGc) compared to healthy cardiac ventricular tissue. NeuAc expression  
294 progressively increased from d7 to d28 post-NSTEMI in all infarcted regions, including F,  
295 reaching a maximum rise of over 40% in IS on d28 (Extended Data Fig. 7a). The observed  
296 NeuGc expression increase on d7 in the infarcted areas (from 34% to 44% more than  
297 healthy) was completely lost at the fibrotic timepoint on d28 (Extended Data Fig. 7a).  
298 Moreover, we also analysed the sialic acid linkage type observing a progressive increase  
299 of  $\alpha$ -(2,3)-sialylation in all regions over the remodelling from d7 to d28 (Extended Data Fig.  
300 7b). For the  $\alpha$ -(2,6)-sialic acid linkage, the proportional increase from the healthy state  
301 was seen at all timepoints in the IS and BZ areas apart from BZ on d28 (Extended Data  
302 Fig. 7b). Finally, a marked difference was seen in the trend of expression of terminal  $\alpha$ -gal.  
303 The initial marked increase seen on d7 post-NSTEMI in IS and BZ regions (over 30%),  
304 was completely lost on d28 in both regions (Extended Data Fig. 7c). We also analysed  
305 released O-linked glycans in NSTEMI, identifying the appearance of post-NSTEMI

306 sialylated structures, mainly present during the early phase of remodelling (d7) (Extended  
307 Data Fig. 7d).

308 Altogether, these data indicated a distinct glycoprofile in the NSTEMI cardiac tissue  
309 characterised by a higher abundance of complex N-glycans and in particular NeuAc (both  
310  $\alpha$ -(2,3)- and  $\alpha$ -(2,6)-sialic acid linkage) on d7 as well as on d28 post-NSTEMI (Fig. 4f).  
311 However, a marked increase in NeuGc and terminal  $\alpha$ -galactose ( $\alpha$ -gal) was associated  
312 only with the early phase of remodelling (d7), but lost through the endpoint (d28) when  
313 NeuAc – and in particular  $\alpha$ -(2,3)-sialylation – were highly present.

314

### 315 **An irreversibly altered extracellular matrix shows specific changes in the HS** 316 **sulfation pattern**

317 To further investigate the extensive changes which occur in the ECM following the  
318 induction of NSTEMI infarcts, we performed additional analyses on essential components  
319 of the myocardial ECM, such as GAGs. Indeed, the restructuring of the ECM is one of the  
320 main consequences of post-ischaemic remodelling in the left ventricular wall<sup>33,36</sup>.  
321 Specifically, GAGs can regulate inflammation and angiogenesis, influencing the  
322 remodelling response<sup>39,40</sup>. The ischaemic core region was initially screened for the  
323 presence of sulfated GAGs (sGAGs) by Alcian Blue staining. This confirmed their  
324 distribution within the fibrotic regions compared with Masson's Trichrome staining (Fig.  
325 5a). Then, sGAGs were extracted from samples of the infarct zone harvested 7- and 28-  
326 days post-NSTEMI. After total GAGs quantification, the ratio between heparan sulfate (HS)  
327 and chondroitin sulfate (CS) was calculated by a subtraction method after enzymatic  
328 digestion of the samples with chondroitinase ABC. An increase in CS was seen on d7  
329 post-MI, bringing from  $0.98\pm 0.02$  in healthy condition to  $0.67\pm 0.08$ , even though this was  
330 not significant ( $p=0.14$ ). Nonetheless, HS/CS ratio significantly ( $p=0.013$ ) decreased to  
331  $0.49\pm 0.13$  on d28, declining together with the advancement of fibrosis (Fig. 5b). Given the  
332 different types of sulfation in the total HS composition, a detailed analysis of N-, 2- and 6-  
333 sulfation pattern was performed by HPLC (Fig. 5c and Extended Data Fig. 8). Indeed, a  
334 marked increase was seen in 6-sulfation (6S) HS portion (Fig. 5c), which is usually  
335 associated with a pronounced angiogenic growth<sup>41</sup>. Specifically, 6S HS increased from  
336  $2.94\pm 1.11\%$  to  $11.87\pm 6.71\%$  ( $p=0.04$ ) on d7 and to  $13.50\pm 5.11\%$  ( $p=0.012$ ) on d28 post-  
337 NSTEMI (Fig. 5c and Extended Data Fig. 8). In addition, a stable significant increase in N-  
338 sulfated (NS) HS from  $4.82\pm 0.60\%$  to  $8.57\pm 1.92\%$  ( $p=0.035$ ) on d7 and to  $11.88\pm 2.63\%$   
339 ( $p<0.001$ ) on d28 post-NSTEMI (Fig. 5c and Extended Data Fig. 8).

340 Despite this increase in 6S HS which would suggest angiogenesis, during post-ischaemic  
341 remodelling an extended fibrotic replacement compromises physiological vascularity,  
342 which is required for normal cardiomyocyte function in healthy conditions. Therefore, to  
343 clarify this point in our model of NSTEMI we have looked at the binding capacity of the  
344 extracted sulfated HS to angiogenic growth factors, such as VEGF. Binding assays  
345 showed a significant drop in the binding capacity 28 days after the surgical procedure  
346 ( $P=0.036$ ) (Fig. 5d), confirming the absence of functional vascularity. In conclusion, ECM  
347 GAGs analysis supported the previously observed functional and histological alterations  
348 following NSTEMI.

349

## 350 **Discussion**

351 Currently, NSTEMI is the most common presentation of acute MI as most cases with an  
352 acute coronary event are NSTEMI patients<sup>4,42-44</sup>. This is partly the result of a widespread  
353 use of risk-factor modifying drugs, powerful lipid-lowering statins, and anti-coagulants  
354 (aspirin)<sup>45</sup>. NSTEMI patients have lower in-patient (during their admission for the primary  
355 NSTEMI) and short-term mortality rates, but significantly higher long-term mortality than  
356 those of STEMI patients<sup>6-8</sup>. A Danish registry study of 8.889 patients showed that the 5-  
357 year mortality after NSTEMI was 16%<sup>46</sup>, and another registry study highlighted a 10-year  
358 survival rate of only around 50%<sup>9</sup>. Nonetheless, to the best of our knowledge, there are  
359 currently no large animal models that can reproduce both the functional and histological  
360 effects of NSTEMIs as a preclinical base to study interventions that might ameliorate short  
361 and long-term effects of NSTEMI. From a preclinical model standpoint, the animal models  
362 currently employed usually adopt the ligation of the LAD at different points, and/or  
363 including diagonal branches of the LAD and branches of the left circumflex artery which  
364 would necessarily produce STEMI and transmural infarcts<sup>10,11</sup>.

365 In contrast, in the model of NSTEMI presented in this study, multiple ligations (2 cm-apart)  
366 lateral and parallel to the LAD were performed from the level of the first diagonal artery -  
367 without including it - to within 3-4 cm of the apex to produce patchy and non-transmural  
368 infarcts, as evidenced by ECG and histological changes in the antero-lateral wall of the left  
369 ventricle. As already well-established in the field, adult sheep were preferred over rodents  
370 to achieve a reliable functional outcome effect comparable with that in human cases<sup>20,28</sup>.  
371 Indeed, without a relevant preclinical relevant model, interventions using a traditional full-  
372 thickness infarction model might lead to clinically ambiguous outcomes<sup>5,47,48</sup>.

373 The 4th Universal definition of MI requires a rise and fall of cTn and one other criterion  
374 from the following: symptoms of acute ischaemia, new ischaemic ECG Changes, new Q-  
375 waves, loss of viable myocardium or a new wall motion abnormality in a pattern consistent  
376 with ischaemic etiology via imaging<sup>31,49</sup>. In the current model we demonstrated that it is  
377 possible to induce infarcts that fulfil all the criteria that define an NSTEMI Type 1 infarct by  
378 this multiple suture procedure. Indeed, a significant rise and fall of cTn over time post-MI  
379 and the changes typical of NSTEMI on ECG and new wall motion abnormalities on  
380 echocardiographic imaging were all present. Moreover, histology showed definitive partial  
381 thickness myocardial necrosis and fibrosis. Nonetheless, several important points should  
382 be noted in trying to correlate an animal model of NSTEMI with features of NSTEMI seen  
383 in the clinics. The absolute peak value of cTn does not consistently correlate with the type  
384 of infarction or size of infarction in NSTEMI; no specific cTn level differentiates STEMI from  
385 NSTEMI, but cTn values may be used for risk stratification for early intervention<sup>50</sup>.  
386 Regarding the evaluation of changes in ECGs, the patterns obtained after the induction of  
387 NSTEMI in sheep reflected the typical range of changes classified as NSTEMI in the  
388 clinical setting.

389 Transthoracic echocardiography (TTE) is a non-invasive and well-recognised tool and the  
390 protocol employed in this study is based on validated methods<sup>51</sup>. Besides the biological  
391 parameters used to determine the response of the infarcted, peri-infarcted and unaffected  
392 areas after NSTEMI, functional parameters were also employed to correlate these  
393 findings. In addition to EF, which is the most widely used parameter to determine and  
394 report left ventricular function, FS was also used. While we acknowledge that the accuracy  
395 of FS can be affected by significant apical wall dysfunction or patchy dysfunction as this  
396 measurement is taken at one transectional point through the tips of the mitral valve  
397 leaflets, which can also sometimes be difficult to pinpoint. FS employs left ventricular end-  
398 diastolic and end-systolic diameters (LVEDD and LVESD). These factors are also  
399 considered potential markers of left ventricular dilatation in response to myocardial injury.  
400 However, LVEDD and LVESD were not primary endpoints since the study endpoint was  
401 on day 28 post-NSTEMI, which may not have allowed sufficient time for dilation in  
402 response to the myocardial injury. Therefore, regional wall motion index (WMI) analysis  
403 was also utilised in this study, and the focus was on the anterolateral walls on TTE. Here  
404 we need to consider that scoring is based on a well-validated 3-point scoring system from  
405 the American Heart Association<sup>52</sup>, and remain aware that the difference between a  
406 normally contracting wall (1), a hypokinetic wall (2) and even an akinetic wall (3) can be

407 subtle in some cases and may vary depending on the observer. We had two different  
408 cardiologists review all echocardiograms independently to reduce potential observer error.  
409 In case of disagreement there was a discussion and consensus on the scoring.  
410 The current model reflects of clinical presentation in NSTEMI patients who develop  
411 myocardial injury and reduction in EF with the significant risk of developing heart failure in  
412 the long-term. Specifically, the average decrease in EF observed one ( $8.52\pm 7.88\%$ ) and  
413 four ( $10\pm 8.31\%$ ) weeks after the surgical procedure is lower than most of the reductions  
414 seen after the total occlusion of the LAD<sup>10,11,27</sup>. The variability in the decrease of this  
415 functional parameter reflects the range in clinical cases where multiple factors can  
416 influence the functional outcome<sup>22</sup>. A main limitation of this model would be the open  
417 thoracotomy nature to create the infarcts. Moreover, although the infarcts are non-  
418 transmural, there is a mixture of subendocardial to epicardial infarcts. In particular,  
419 epicardial infarcts may impact wall tension differently in the longer-term compared with  
420 subendocardial infarcts, resulting in different outcomes in left ventricular geometry.  
421 As previously mentioned, a critical gap in the field of cardiovascular research is the lack of  
422 a large animal model that can resemble the clinical cases showing non-full thickness,  
423 localised infarcts rather than transmural infarcts in the left ventricular wall. Histological,  
424 gene expression and protein analyses indicated that the damaged areas followed the  
425 same irreversible fibrotic pattern seen by using STEMI ovine models<sup>20,28</sup>. In addition,  
426 extended effects of cardiomyocyte necrosis in the border zone were seen at the  
427 mitochondrial level, including the accumulation of dense bodies inside mitochondria, as  
428 previously reported after intracoronary balloon occlusion in a swine model<sup>53</sup>.  
429 Post-ischaemic remodelling is tightly coupled with profound alterations in the organisation  
430 and composition of the cardiac ECM<sup>33,36</sup>. By proposing a thorough characterisation of the  
431 molecular changes occurring in the transcriptome and proteome of the presented NSTEMI  
432 model, the relevance of ECM components such as glycoproteins, which were only partially  
433 investigated within this context in previous studies<sup>18,54</sup>, has here clearly emerged. Very few  
434 studies determined glycosylation alterations post-MI and only following conventional  
435 STEMI induction<sup>18,54</sup>. Here, in contrast, using a model of NSTEMI we derived from  
436 pathway analyses on gene expression data the relevance of molecular changes in glycans  
437 occurring during the post-ischaemic remodelling (day 7 and 28), rather than a pure  
438 characterisation of the cardiac post-ischaemic ECM<sup>18,54</sup>. Indeed, technical advances in  
439 processing and identifying glycans by mass spectrometry have only recently been  
440 developed. These can now be used as tools to elucidate the biological role of glycans<sup>55-57</sup>.

441 Specifically, LC-ESI-MS/MS on N-linked glycans confirmed the previously reported  
442 increase in sialylation<sup>54</sup>, and identified crucial changes such as the marked expression of  
443 NeuGc and terminal  $\alpha$ -gal only at the inflammatory phase (day 7). Moreover, since most  
444 studies evaluating the relevance of NeuGc relate either to cancer biology or to  
445 immunotherapy pertaining to xenogeneic reactions<sup>58-60</sup>, data reported in this study  
446 constitute a key finding on the expression of NeuGc in myocardial tissue. A relevant study  
447 observed a higher NeuGc/NeuAc ratio in adult than in neonatal myocardial tissue<sup>61</sup>.  
448 However, this increase in NeuGc was only tenuously associated with cardiomyocyte  
449 development, and the precise extent of this change was not defined<sup>61</sup>. In relation to  
450 terminal  $\alpha$ -gal increase seen in the proposed model on day 7 post-NSTEMI, so far an  
451 increased expression of this marker was demonstrated in extensive studies carried out by  
452 the Galili group only in wound healing models<sup>62,63</sup>. In addition,  $\alpha$ -gal had been found  
453 specifically on N-linked glycans in bovine, equine and porcine pericardium<sup>64</sup>. Thus, the  
454 increased expression of  $\alpha$ -gal in the inflammatory phase post-MI may be mainly due to the  
455 temporary recruitment of a disordered and highly proliferative granulation-type tissue.  
456 Here, by dissecting the putative N- and O-glycan structures present in the cellular  
457 membrane and ECM fractions, we have identified for the first time the precise changes in  
458 the glycoprofile pattern through cardiac post-ischaemic remodelling.

459 Such alterations in glycan expression were also present in ECM components such as  
460 GAGs which, unlike the changes in cellular membrane N- and O-glycan composition  
461 reported above, contain well-known glycan moieties. Importantly, GAGs are among the  
462 structurally fundamental moieties of the ECM; they also play a relevant role in both the  
463 TLR-related inflammatory response and the enhancement of angiogenesis through the  
464 binding to growth factors<sup>65-67</sup>. We defined how the balance between HS and CS varied  
465 post-ischaemia to further advance the current knowledge on cardiac post-ischaemic  
466 remodelling. Thus, after quantifying the different GAGs across the remodelling timepoints  
467 and by focusing on HS sulfate pattern, we identified increases in markers of angiogenesis  
468 on day 7 post-NSTEMI (6S HS). Despite the well-known interaction of 6S HS with  
469 angiogenic growth factors<sup>41</sup>, VEGF binding assay data excluded an actual sustained  
470 angiogenic effect throughout post-ischaemic remodelling. Therefore, the current model of  
471 NSTEMI would include the timely formation of a non-functional vasculature bed in the  
472 effected ischaemic area, as it also occurs after STEMI induction in large animals<sup>68</sup>.

473

474 This model of non-full thickness MI resembles clinical non-transmural infarcts that are the  
475 most prominent type and continue to increase in prevalence among the hospitalised  
476 patients. Since there are currently no molecular therapeutic options, the specific alterations  
477 in glycans present in the cellular membrane and ECM that we reported at the acute stage  
478 post-NSTEMI could be directly targeted by advanced tailored biological interventions to  
479 ameliorate the long-term effects of this type of infarction.

480

## 481 **Figures legends**

482

### 483 **Figure 1 | Clinically relevant ovine model of NSTEMI**

484 **a**, Schematics of the multiple ligation procedure to induce NSTEMI infarcts. **b**,  
485 Representative photographs of 8-month-old explanted and axially-cut sheep hearts 28  
486 days post-ligation. Blue Prolene sutures were used to track NSTEMI infarcts (framed in  
487 blue).  $n=11$  animals. 1-mm ruler spacing. Insets shown at higher magnification above.  
488 Scale bar, 1 cm. **c**, Left, ejection fraction (EF) absolute values before ligation (baseline), 7  
489 (d7) and 28 (d28) days post-ligation and relative decrease in EF on d7 and d28 post-  
490 surgery (left). Right, measurement of left ventricular end diastolic (EDD) and systolic  
491 (ESD) on d7 and 28 post-ligation.  $n=11$  animals. **d**, Regional wall motion analysis in the  
492 main six cardiac segments affected by the induction of NSTEMI by ligation. Wall motion  
493 index is shown as mean  $\pm$  s.d at d7 and d28 post-NSTEMI induction.  $n=11$  animals. **e**,  
494 Representative electrocardiogram (ECG) before NSTEMI-induction (left) and post-ligation  
495 (right). Changes in T wave inversion, in leads I, II, III and aVF are circled in red.  $n=4$   
496 animals. Kruskal-Wallis test in (**c**), multiple unpaired t-test with Benjamini's method in (**d**).  
497  $*P<0.05$ ,  $**P<0.01$ ,  $***P<0.001$ .

498

### 499 **Figure 2 | Ischaemic cellular damage and extracellular adverse remodelling** 500 **following NSTEMI**

501 **a**, Representative TEM micrographs showing ultracellular damage in healthy (HLT)  
502 cardiomyocytes (far left) starting from intercalated disks disruption on d7 post-NSTEMI  
503 (center), to extended vacuolisation (dashed red line) on d28 post-NSTEMI (right),  
504 surrounded by collagen deposition (arrows) by myofibroblasts.  $n=5$  HLT and d7,  $n=7$  d28  
505 animals. Scale bars, 2  $\mu\text{m}$ . **b**, Representative Masson's Trichrome staining of ischaemic  
506 core (IS) and border zone (BZ) regions of NSTEMI infarcted tissues on d7 and d28.  $n=5$   
507 animals per group. Scale bars, 100  $\mu\text{m}$ . **c**, Representative TEM micrographs of

508 mitochondria in cardiomyocytes located in the BZ of the infarct. Inset shows accumulation  
509 of dense bodies (circled in red) on d7 post-NSTEMI.  $n=5$  animals. Scale bars, 2  $\mu\text{m}$ . **d**,  
510 Immunofluorescence microscopy of collagen fibrotic replacement (left) and sparse  $\alpha\text{-SMA}^+$   
511 arterioles (right) in IS on d28.  $n=5$  animals. Scale bars, 20  $\mu\text{m}$ .

512

### 513 **Figure 3 | Post-ischaemic pathways alteration following NSTEMI**

514 **a**, Volcano plots showing the total genes significantly upregulated ( $\log_2(\text{fold change}) > 1.5$ )  
515 between the core ischaemic (IS), border (BZ) and remote (F) regions sampled at d7 and  
516 d28 post-NSTEMI.  $n=4$  animals per group. **b**, Significant canonical pathways resulting  
517 from differentially expressed genes (DEG) data from RNA sequencing (analysed by IPA<sup>®</sup>).  
518 Cut-offs of  $\log_2(\text{fold change}) > 1.5$  and  $\log_2(\text{fold change}) < -1.5$  and adjusted- $P < 0.05$  were  
519 set. Dashed line shows a threshold of  $-\text{Log}(p\text{-value})$  of 1.3, corresponding to  $P=0.05$ . All  
520 DEG data were normalised to healthy baseline left ventricular samples.  $n=4$  animals per  
521 group. **c**, Main activated biological functions listed by highest z-score from IPA<sup>®</sup> analysis  
522 on RNA-seq data from IS samples on d7 and d28 post-NSTEMI.  $n=4$  animals per group. **d**,  
523 Expression levels of myofibroblast-related markers vimentin and calponin 1 as detected by  
524 nLC-ESI-MS/MS analysis on IS samples. Each analysed sample was a pool of samples  
525 coming from three animals.

526

### 527 **Figure 4 | Distinct glycoprofile in the infarcted heart following NSTEMI**

528 **a**, 10 high mannose N-glycans putative structures detected by PG-LC-ESI-MS/MS and  
529 analysed by hierarchical clustering. **b**, Relative percentage of high mannose among total  
530 N-glycans putative structures across healthy and infarcted myocardial membrane cellular  
531 samples at d7 and d28 post-NSTEMI. **c**, 78 complex N-glycans putative structures  
532 detected by PG-LC-ESI-MS/MS and analysed by hierarchical clustering. **d,e** Relative  
533 percentage of complex (**d**) and hybrid (**e**) among total N-glycans putative structures across  
534 healthy (HLT) and infarcted myocardial membrane cellular samples at d7 and d28 post-  
535 NSTEMI. **f**, Extracted ion chromatography (EIC) showing N-linked glycans mainly  
536 expressed in the membrane protein extracts from HLT myocardium and IS at d7 and d28  
537 post-NSTEMI. Regions of infarcted hearts are labelled as follows: IS= core ischaemic, BZ  
538 = border zone, F = remote zone from the infarct. Data are representative of two  
539 independent experiments. Each analysed sample was a pool of samples coming from  
540 three individuals per group and region and analysed by PG-LC-ESI-MS/MS.

541



542 **Figure 5 | An irreversibly-altered extracellular matrix shows specific changes in the**  
543 **HS sulfation pattern following NSTEMI**

544 **a**, Representative Alcian Blue (top) and Masson's Trichrome (bottom) stainings to show  
545 sulfated glycosaminoglycans (GAGs) and collagen (dashed in red) in ischaemic core (IS)  
546 regions of NSTEMI infarcts on d28 post-NSTEMI.  $n=5$  animals per group. **b**, Quantification  
547 of heparan sulfate (HS) to chondroitin sulfate (CS) ratio in GAGs extracted from tissue.  
548  $n=4$  animals at d7 and  $n=5$  healthy (HLT) and d28 post-NSTEMI. **c**, Relative percentage of  
549 NS, 2S and 6S sulfation in extracted HS across the healthy (HLT) and IS samples at d7  
550 and d28 post-NSTEMI.  $n=5$  HLT,  $n=4$  at d7 and  $n=5$  at d28 post-NSTEMI. **d**, VEGF  
551 binding capacity of extracted total GAGs (at 100  $\mu\text{g/ml}$ ) across the HLT and IS samples at  
552 d28 post-NSTEMI.  $n=3$  HLT and  $n=5$  animals at d28 post-NSTEMI. Kruskal-Wallis test in  
553 (**b,c**), Mann-Whitney test in **d**. \* $P<0.05$ , \*\*\* $P<0.001$ .

554

555 **References**

556

- 557 1. Roth GA *et al.* Global burden of cardiovascular diseases and risk factors, 1990-2019:  
558 Update from the GBD 2019 Study. *J. Am. Coll. Cardiol.* **76**, 2982-3021 (2020)
- 559 2. Xie Y, Xu E, Bowe B, Al-Aly Z. Long-term cardiovascular outcomes of COVID-19. *Nat.*  
560 *Med.* Feb 7 (2022)
- 561 3. Bahit MC, Kochar A, Granger CB. Post-myocardial infarction heart failure. *JACC Heart*  
562 *Fail.* **6**, 179-186 (2018).
- 563 4. McManus DD *et al.* Recent trends in the incidence, treatment, and outcomes of  
564 patients with STEMI and NSTEMI. *Am. J. Med.* **124**, 40-47 (2011)
- 565 5. Roger VL *et al.* Trends in incidence, severity, and outcome of hospitalized myocardial  
566 infarction. *Circulation* **121**, 863-869 (2010)
- 567 6. Ishihara M *et al.* Long-term outcomes of non-ST-elevation myocardial infarction without  
568 creatine kinase elevation - The J-MINUET Study. *Circ. J.* **81**, 958-965 (2017)
- 569 7. Rea F, Ronco R, Pedretti RFE, Merlino L, Corrao G. Better adherence with out-of-  
570 hospital healthcare improved long-term prognosis of acute coronary syndromes:  
571 Evidence from an Italian real-world investigation. *Int. J. Cardiol.* **318**, 14-20 (2020)
- 572 8. Vora AN *et al.* Differences in short- and long-term outcomes among older patients with  
573 ST-elevation versus non-ST-elevation myocardial infarction with angiographically  
574 proven coronary artery disease. *Circ. Cardiovasc. Qual. Outcomes.* **9**, 513-522 (2016)

- 575 9. Erdem G *et al.* Rates and causes of death from non-ST elevation acute coronary  
576 syndromes: ten year follow-up of the PRAIS-UK registry. *Int. J. Cardiol.* **168**, 490-494  
577 (2013)
- 578 10. Gabisonia K *et al.* MicroRNA therapy stimulates uncontrolled cardiac repair after  
579 myocardial infarction in pigs. *Nature* **569**, 418-422 (2019)
- 580 11. D'Uva G *et al.* ERBB2 triggers mammalian heart regeneration by promoting  
581 cardiomyocyte dedifferentiation and proliferation. *Nat. Cell. Biol.* **17**, 627-638 (2015)
- 582 12. Weston C, Reinoga K, van Leeven R, Demian V. Myocardial Ischaemia National Audit  
583 Project - How the NHS cares for patients with heart attacks. Annual Public Report April  
584 2014-March 2015 (NICOR Report, University College London, 2017)
- 585 13. Moainie SL *et al.* An ovine model of postinfarction dilated cardiomyopathy. *Ann. Thorac.*  
586 *Surg.* **74**, 753-760 (2002)
- 587 14. Schmitto JD *et al.* A novel, innovative ovine model of chronic ischemic cardiomyopathy  
588 induced by multiple coronary ligations. *Artif. Organs.* **34**, 918-922 (2010)
- 589 15. Hashimoto H, Olson EN, Bassel-Duby R. Therapeutic approaches for cardiac  
590 regeneration and repair. *Nat. Rev. Cardiol.* **15**, 585-600 (2018)
- 591 16. Farbehi N *et al.* Single-cell expression profiling reveals dynamic flux of cardiac stromal,  
592 vascular and immune cells in health and injury. *Elife* **26**, 8:e43882 (2019)
- 593 17. Tombor LS *et al.* Single cell sequencing reveals endothelial plasticity with transient  
594 mesenchymal activation after myocardial infarction. *Nat. Commun.* **12**, 681 (2021)
- 595 18. Parker BL *et al.* Quantitative N-linked glycoproteomics of myocardial ischemia and  
596 reperfusion injury reveals early remodeling in the extracellular environment. *Mol. Cell.*  
597 *Proteomics.* **10**, M110.006833 (2011)
- 598 19. Zhao RR *et al.* Targeting chondroitin sulfate glycosaminoglycans to treat cardiac  
599 fibrosis in pathological remodeling. *Circulation.* **137**, 2497-2513 (2018)
- 600 20. Ifkovits JL *et al.* Injectable hydrogel properties influence infarct expansion and extent of  
601 postinfarction left ventricular remodeling in an ovine model. *Proc. Natl. Acad. Sci. USA.*  
602 **107**, 11507-11512 (2010)
- 603 21. Macarthur JW Jr *et al.* Preclinical evaluation of the engineered stem cell chemokine  
604 stromal cell-derived factor 1 $\alpha$  analog in a translational ovine myocardial infarction  
605 model. *Circ. Res.* **114**, 650-659 (2014)
- 606 22. Miller AL *et al.* Left ventricular ejection fraction assessment among patients with acute  
607 myocardial infarction and its association with hospital quality of care and evidence-  
608 based therapy use. *Circ. Cardiovasc. Qual. Outcomes.* **5**, 662-671 (2012)

- 609 23. Sugiyama T *et al.* Differential time trends of outcomes and costs of care for acute  
610 myocardial infarction hospitalizations by ST elevation and type of intervention in the  
611 United States, 2001-2011. *J. Am. Heart Assoc.* **4**, e001445 (2015)
- 612 24. Mihalko E, Huang K, Sproul E, Cheng K, Brown AC. Targeted treatment of ischemic  
613 and fibrotic complications of myocardial infarction using a dual-delivery microgel  
614 therapeutic. *ACS Nano.* **12**, 7826-7837 (2018)
- 615 25. Kaul P *et al.* Incidence of heart failure and mortality after acute coronary syndromes.  
616 *Am. Heart J.* **165**, 379-85.e2 (2013)
- 617 26. Arora S *et al.* Impact of type 2 myocardial infarction (MI) on hospital-level MI outcomes:  
618 Implications for quality and public reporting. *J. Am. Heart Assoc.* **7**, e008661 (2018)
- 619 27. Dixon JA *et al.* Targeted regional injection of biocomposite microspheres alters post-  
620 myocardial infarction remodeling and matrix proteolytic pathways. *Circulation* **124**  
621 (2011)
- 622 28. Houtgraaf JH *et al.* Intracoronary infusion of allogeneic mesenchymal precursor cells  
623 directly after experimental acute myocardial infarction reduces infarct size, abrogates  
624 adverse remodeling, and improves cardiac function. *Circ. Res.* **113**, 153-166 (2013)
- 625 29. Pfeffer MA, Braunwald E. Ventricular remodeling after myocardial infarction.  
626 Experimental observations and clinical implications. *Circulation.* **81**, 1161-1172 (1990)
- 627 30. Warren SE, Royal HD, Markis JE, Grossman W, McKay RG. Time course of left  
628 ventricular dilation after myocardial infarction: influence of infarct-related artery and  
629 success of coronary thrombolysis. *J. Am. Coll. Cardiol.* **11**, 12-19 (1988)
- 630 31. Hilliard AL, Winchester DE, Russell TD, Hilliard RD. Myocardial infarction classification  
631 and its implications on measures of cardiovascular outcomes, quality, and racial/ethnic  
632 disparities. *Clin. Cardiol.* **43**, 1076-1083 (2020)
- 633 32. Mühlfeld C, Nyengaard JR, Mayhew TM. A review of state-of-the-art stereology for  
634 better quantitative 3D morphology in cardiac research. *Cardiovasc. Pathol.* **19**, 65-82  
635 (2010)
- 636 33. Cahill TJ, Choudhury RP, Riley PR. Heart regeneration and repair after myocardial  
637 infarction: translational opportunities for novel therapeutics. *Nat. Rev. Drug. Discov.* **16**,  
638 699-717 (2017)
- 639 34. Homans DC *et al.* Regional function and perfusion at the lateral border of ischemic  
640 myocardium. *Circulation.* **71**, 1038-1047 (1985)
- 641 35. Driesen RB *et al.* Structural remodelling of cardiomyocytes in the border zone of  
642 infarcted rabbit heart. *Mol. Cell. Biochem.* **302**, 225-232 (2007)

- 643 36. Frangogiannis NG. Cardiac fibrosis: Cell biological mechanisms, molecular pathways  
644 and therapeutic opportunities. *Mol. Aspects Med.* **65**, 70-99 (2019)
- 645 37. Weil BR, Neelamegham S. Selectins and immune cells in acute myocardial infarction  
646 and post-infarction ventricular remodeling: Pathophysiology and novel treatments.  
647 *Front. Immunol.* **10**, 300 (2019)
- 648 38. Contessotto P *et al.* Distinct glycosylation in membrane proteins within neonatal versus  
649 adult myocardial tissue. *Matrix Biol.* **85-86**, 173-188 (2020)
- 650 39. Rouet V *et al.* A synthetic glycosaminoglycan mimetic binds vascular endothelial  
651 growth factor and modulates angiogenesis. *J. Biol. Chem.* **280**, 32792-32800 (2005)
- 652 40. Huynh MB *et al.* Age-related changes in rat myocardium involve altered capacities of  
653 glycosaminoglycans to potentiate growth factor functions and heparan sulfate-altered  
654 sulfation. *J. Biol. Chem.* **287**, 11363-11373 (2012)
- 655 41. Ferreras C *et al.* Endothelial heparan sulfate 6-O-sulfation levels regulate angiogenic  
656 responses of endothelial cells to fibroblast growth factor 2 and vascular endothelial  
657 growth factor. *J. Biol. Chem.* **287**, 36132-36146 (2012)
- 658 42. Alkhouli M *et al.* Age-stratified sex-related differences in the incidence, management,  
659 and outcomes of acute myocardial infarction. *Mayo Clin. Proc.* **96**, 332-341 (2021)
- 660 43. Mozaffarian D *et al.* Heart disease and stroke statistics--2015 update: a report from the  
661 American Heart Association. *Circulation.* **131**, e29-322 (2015)
- 662 44. Darling CE *et al.* Survival after hospital discharge for ST-segment elevation and non-  
663 ST-segment elevation acute myocardial infarction: a population-based study. *Clin.*  
664 *Epidemiol.* **5**, 229-236 (2013)
- 665 45. Weidmann L *et al.* Pre-existing treatment with aspirin or statins influences clinical  
666 presentation, infarct size and inflammation in patients with de novo acute coronary  
667 syndromes. *Int. J. Cardiol.* **275**, 171-178 (2019)
- 668 46. Alzuhairi KS *et al.* Long-term prognosis of patients with non-ST-segment elevation  
669 myocardial infarction according to coronary arteries atherosclerosis extent on coronary  
670 angiography: a historical cohort study. *BMC Cardiovasc. Disord.* **17**, 279 (2017)
- 671 47. Rogers WJ *et al.* Trends in presenting characteristics and hospital mortality among  
672 patients with ST elevation and non-ST elevation myocardial infarction in the National  
673 Registry of Myocardial Infarction from 1990 to 2006. *Am. Heart J.* **156**, 1026-1034  
674 (2008)
- 675 48. Lindsey ML *et al.* Guidelines for experimental models of myocardial ischemia and  
676 infarction. *Am. J. Physiol. Heart Circ. Physiol.* **314**, H812-H838 (2018)

- 677 49. Thygesen K *et al.* Fourth Universal Definition of Myocardial Infarction (2018).  
678 *Circulation*. **138**, e618-e651 (2018)
- 679 50. Roffi M *et al.* 2015 ESC Guidelines for the management of acute coronary syndromes  
680 in patients presenting without persistent ST-segment elevation: task force for the  
681 management of acute coronary syndromes in patients presenting without persistent st-  
682 segment elevation of the European Society of Cardiology (ESC). *Eur. Heart J.* **37**, 267-  
683 315 (2016)
- 684 51. Hallowell GD, Potter TJ, Bowen IM. Reliability of quantitative echocardiography in adult  
685 sheep and goats. *BMC Vet. Res.* **8**, 181 (2012)
- 686 52. Gottdiener JS *et al.* American Society of Echocardiography recommendations for use  
687 of echocardiography in clinical trials. *J. Am. Soc. Echocardiogr.* **17**, 1086-1119 (2004)
- 688 53. Galindo CL *et al.* Anti-remodeling and anti-fibrotic effects of the neuregulin-1 $\beta$  glial  
689 growth factor 2 in a large animal model of heart failure. *J. Am. Heart Assoc.* **3**, e000773  
690 (2014)
- 691 54. Yang S, Chatterjee S, Cipollo J. The glycoproteomics-MS for studying glycosylation in  
692 cardiac hypertrophy and heart failure. *Proteomics Clin Appl.* 2018 Sep;12(5):e1700075
- 693 55. Jensen PH, Karlsson NG, Kolarich D, Packer NH. Structural analysis of N- and O-  
694 glycans released from glycoproteins. *Nat. Protoc.* **7**, 1299-1310 (2012)
- 695 56. Everest-Dass AV, Abrahams JL, Kolarich D, Packer NH, Campbell MP. Structural  
696 feature ions for distinguishing N- and O-linked glycan isomers by LC-ESI-IT MS/MS. *J.*  
697 *Am. Soc. Mass Spectrom.* **24**, 895-906 (2013)
- 698 57. Levery SB *et al.* Advances in mass spectrometry driven O-glycoproteomics. *Biochim.*  
699 *Biophys. Acta.* **1850**, 33-42 (2015)
- 700 58. He D *et al.* Generation and characterization of a IgG monoclonal antibody specific for  
701 GM3 (NeuGc) ganglioside by immunizing  $\beta$ 3Gn-T5 knockout mice. *Sci. Rep.* **8**, 2561  
702 (2018)
- 703 59. Hernández AM *et al.* Characterization of the antibody response against NeuGcGM3  
704 ganglioside elicited in non-small cell lung cancer patients immunized with an anti-  
705 idiotypic antibody. *J. Immunol.* **181**, 6625-6634 (2008)
- 706 60. Barone A, Benktander J, Teneberg S, Breimer ME. Characterization of acid and non-  
707 acid glycosphingolipids of porcine heart valve cusps as potential immune targets in  
708 biological heart valve grafts. *Xenotransplantation.* **21**, 510-522 (2014)
- 709 61. Montpetit ML *et al.* Regulated and aberrant glycosylation modulate cardiac electrical  
710 signaling. *Proc. Natl. Acad. Sci. USA.* **106**, 16517-16522 (2009)

- 711 62. Wigglesworth KM *et al.* Rapid recruitment and activation of macrophages by anti-Gal/ $\alpha$ -  
712 Gal liposome interaction accelerates wound healing. *J. Immunol.* **186**, 4422-4432  
713 (2011)
- 714 63. Hurwitz ZM, Ignatz R, Lalikos JF, Galili U. Accelerated porcine wound healing after  
715 treatment with  $\alpha$ -gal nanoparticles. *Plast Reconstr Surg.* 2012 Feb;129(2):242e-251e
- 716 64. Jin C *et al.* Identification by mass spectrometry and immunoblotting of xenogeneic  
717 antigens in the N- and O-glycomes of porcine, bovine and equine heart tissues.  
718 *Glycoconj. J.* **37**, 485–498 (2020).
- 719 65. Olivares-Silva F *et al.* Heparan sulfate potentiates leukocyte adhesion on cardiac  
720 fibroblast by enhancing Vcam-1 and Icam-1 expression. *Biochim. Biophys. Acta.* **1864**,  
721 831-842 (2018)
- 722 66. Taylor KR, Gallo RL. Glycosaminoglycans and their proteoglycans: host-associated  
723 molecular patterns for initiation and modulation of inflammation. *FASEB J.* **20**, 9-22  
724 (2006)
- 725 67. Prante C *et al.* Transforming growth factor beta1-regulated xylosyltransferase I activity  
726 in human cardiac fibroblasts and its impact for myocardial remodeling. *J. Biol. Chem.*  
727 **282**, 26441-26449 (2007)
- 728 68. Gkontra P *et al.* Deciphering microvascular changes after myocardial infarction through  
729 3D fully automated image analysis. *Sci. Rep.* **8**, 1854 (2018)
- 730 69. Zhu W *et al.* Regenerative potential of neonatal porcine hearts. *Circulation.* **138**, 2809-  
731 2816 (2018)
- 732 70. Barbosa I *et al.* Improved and simple micro assay for sulfated glycosaminoglycans  
733 quantification in biological extracts and its use in skin and muscle tissue studies.  
734 *Glycobiology.* **13**, 647-653 (2003)
- 735 71. Dubail J *et al.* SLC10A7 mutations cause a skeletal dysplasia with amelogenesis  
736 imperfecta mediated by GAG biosynthesis defects. *Nat. Commun.* **9**, 3087 (2018)
- 737 72. Schulz BL, Packer NH, Karlsson NG. Small-scale analysis of O-linked oligosaccharides  
738 from glycoproteins and mucins separated by gel electrophoresis. *Anal. Chem.* **74**,  
739 6088-6097 (2002)
- 740 73. Liu Y *et al.* The minimum information required for a glycomics experiment (MIRAGE)  
741 project: improving the standards for reporting glycan microarray-based data.  
742 *Glycobiology.* **27**, 280-284 (2017)
- 743 74. Chinello C *et al.* Proteomics of liquid biopsies: Depicting RCC infiltration into the renal  
744 vein by MS analysis of urine and plasma. *J. Proteomics.* **191**, 29-37 (2019)

- 745 75.Liu X *et al.* Intraluminal proteome and peptidome of human urinary extracellular  
746 vesicles. *Proteomics Clin. Appl.* **9**, 568-573 (2015)  
747 76.Zhang J *et al.* PEAKS DB: de novo sequencing assisted database search for sensitive  
748 and accurate peptide identification. *Mol. Cell. Proteomics.* **11**, M111.010587 (2012)

749

## 750 **Methods**

751

### 752 **NSTEMI ovine model**

753 Regulations established by the European Union directive on the protection of animals for  
754 scientific research (2010/63/EU) were followed to perform all the animal experiments  
755 presented in the current study. A veterinary team performed all surgical procedures and  
756 provided post-operative animal care. To induce NSTEMI, Romanov ten-month-old adult  
757 male sheep (35 kg weight on average) were sedated with Telazol® 6 mg/kg (Zoetis, USA)  
758 and endotracheally intubated. Anesthesia was maintained with 1–2% isoflurane (Baxter,  
759 USA). Electrocardiogram (ECG) was employed to monitor NSTEMI induction throughout  
760 the procedure and duration of anaesthesia. Magnesium 2 mg (Pfizer, USA), and  
761 amiodarone 1.5 mg/kg (Pfizer, USA) were intravenously injected in sheep before  
762 performing the surgical procedure to induce NSTEMI. Following NSTEMI, an intravenous  
763 infusion of amiodarone 0.01 mg/kg/min was administered for 1 hour to prevent ventricular  
764 arrhythmias. During and following surgeries, animals received intramuscular benzylpenicillin  
765 600 mg (Pfizer, USA) three times a day, and streptomycin 500 mg twice daily (Pfizer,  
766 USA), for five days. Flunixin meglumine 2.2 mg/kg (Excella GmbH, Germany) was used as  
767 analgesic for five days. Whenever lung oedema was detected, hydrocortisone 250 mg  
768 intravenous (Pfizer, USA) was administered three times a day.

769 Induction of NSTEMI was performed by ligating multiple, strategic coronary artery ligations  
770 on the LV lateral to and parallel to the LAD. Specifically, a left lateral thoracotomy was  
771 performed through the fourth intercostal space, followed by a pericardiotomy. Deep non-  
772 transmural ligations were performed with 2/0 Prolene (J&J Ethicon EMEA, Belgium) at 2  
773 cm intervals lateral and parallel to the LAD from the level of the first diagonal moving  
774 distally towards and up to 3-4 cm from the apex (see diagram). The blue Prolene sutures  
775 used to ligate the coronaries were cut long to allow tracking of the infarction site to aid  
776 identification of the sites of infarction. The pericardium was closed with 4/0 Prolene after  
777 obtaining absolute hemostasis to limit post-operative adhesions and facilitate re-entry at a  
778 later time-point in interventional studies. A chest tube was placed with its tip in the

779 pericardial sac and the remnant holes in the left chest before the thoracotomy was closed  
780 in layers, and the animal recovered. The animals were given analgesia and fluids post-  
781 operatively as outlined by the institutional protocol. Echocardiography measurements were  
782 recorded the day before each surgical procedure and at the study time points of 7 and 28  
783 days. All echocardiographic examinations were performed in calm, unsedated standing  
784 animals. A 5 MHz probe was employed and the console and software used were Mindray  
785 7 (Mindray Bio-Medical Electronics Co. Ltd). Images and windows for the  
786 echocardiographic protocol were derived from techniques described for horses and more  
787 recently adapted for sheep<sup>51</sup>. Two cardiologists performed examinations and agreed on  
788 the interpretation and derivation of the data. Six two-dimensional (2-D) parasternal images  
789 were obtained from the right, and three 2-D parasternal images from the left. Indices  
790 captured were EF, FS, LV volumes and diameters as well as regional wall motion.

791

#### 792 **Heart explantation, sampling and tissue processing for histology**

793 At the endpoint of the study (day 28 post-NSTEMI), sheep were anaesthetised as detailed  
794 in the description of the surgical induction of NSTEMI. After reopening the thoracotomy  
795 wound and pericardium, hearts were explanted. Perfusion with PBS was performed twice  
796 to wash out any remaining blood following the explantation. Each explanted heart was  
797 sectioned from the ventricular region in an axial way keeping a thickness of 1 cm for each  
798 slice. NSTEMI infarcts were visible by whitish colouring of the affected regions in the left  
799 ventricle. Explant images were taken with a Cyber-shot DSC-HX200V camera (Sony,  
800 Japan). Tissue harvesting was performed by taking multiple samples (0.5 cm maximum)  
801 from the ischaemic site, border and remote area. Tissue processing considered the  
802 optimal conditions according to the future analysis to be performed. Specifically, samples  
803 for histology were submerged in 4% PFA O/N at 4°C. Importantly, histological and  
804 immunofluorescence experiments were performed by using a minimum of three sections  
805 per sheep, as previously performed<sup>69</sup>.

806

#### 807 **Quantification of heparan to chondroitin sulfate ratio**

808 At the time of tissue harvesting around 200 mg of left ventricular tissue from healthy and  
809 peri-infarct areas on day 7 and 28 post-NSTEMI were snap-frozen to be processed to  
810 extract total sulfated glycosaminoglycans (GAGs). First, dried-powdered samples were  
811 weighed and suspended in a buffer to a final concentration of 25 mg of tissue/mL. Tissue  
812 digestion was performed by incubating the tissue suspension with proteinase K (PK, 50



813  $\mu\text{g/mL}$ , Merck, Germany) at  $56^\circ\text{C}$  O/N. After enzymatic inactivation at  $90^\circ\text{C}$  for 30 min,  
814 Dnase (7.5 U/ml, Qiagen, Germany) was added and samples were incubated O/N. Lipid  
815 elimination was performed by chloroform extraction, as previously described<sup>40</sup>. After GAGs  
816 dialysis, 1,9-dimethylmethylene blue (DMMB) assay was used to quantify GAGs, as  
817 already performed<sup>70</sup>. Heparan sulfate (HS) and chondroitin sulfate (CS) quantities were  
818 determined by incubating digested samples with a cocktail of heparinases (Iduron, UK), as  
819 previously described<sup>71</sup>. Specifically, chondroitinase ABC (25 mU/sample, 2 h at  $37^\circ\text{C}$ ) was  
820 used for specific CS elimination. Absence of a significant abundance of other GAGs in  
821 tissue samples was checked by combining both heparinases and chondroitinases.

822

### 823 **LC-ESI-MS/MS glycomic analysis**

824 After following the procedure to release *N*- and *O*-linked glycans from membrane protein  
825 samples, liquid chromatograph-electrospray ionization tandem mass spectrometry (LC-ESI  
826 MS/MS) was run to perform the glycomic analysis, as previously reported<sup>72</sup>. A packed in-  
827 house column (10 cm  $\times$  250  $\mu\text{m}$ ) with 5  $\mu\text{m}$  porous graphite particles (Hypercarb<sup>TM</sup>,  
828 Thermo Fisher Scientific, USA) was used to separate oligosaccharides. Then, following  
829 oligosaccharide injection on to the column, samples were eluted with an ACN gradient  
830 (Buffer A, 10 mM ammonium bicarbonate; Buffer B, 10 mM ammonium bicarbonate in 80%  
831 ACN). A 40 cm  $\times$  50  $\mu\text{m}$  i.d. fused silica capillary was used as a transfer line to the ion  
832 source. A Linear Trap Quadrupole (LTQ)-mass spectrometer (Thermo Fisher Scientific,  
833 USA), with an IonMax standard ESI source was used to analyse samples in negative ion  
834 mode. The heated capillary was kept at  $270^\circ\text{C}$ , and the capillary voltage was  $-50$  kV. Each  
835 sample was analysed by full scan ( $m/z$  380-2000 two microscans, maximum 100 ms,  
836 target value of 30,000), together with MS<sup>2</sup> scans (two microscans, maximum 100 ms,  
837 target value of 10,000) with normalised collision energy of 35%, isolation window of 1.0  
838 units, activation  $q=0.25$  and activation time 30 ms). The threshold for MS<sup>2</sup> was set to 300  
839 counts. Xcalibur<sup>TM</sup> software (Version 2.0.7, Thermo Fisher Scientific, USA) was used to  
840 perform data acquisition and processing. Identification of the putative glycan structures  
841 present in the samples was conducted by manual annotation from their MS/MS spectra.  
842 Importantly, assumptions were made to indicate structural annotations. Briefly, *N*- and *O*-  
843 linked glycan structures were assumed to follow the classic biosynthetic pathways. In  
844 addition, diagnostic fragmentation ions to determine *N*- and *O*-glycans was performed as  
845 previously described<sup>56</sup>. To identify  $\alpha$ -linked Gal, terminal hexose-hexose units were  
846 considered.

847 Following MIRAGE guidelines<sup>73</sup> for glycomic analysis, N- and O-glycan annotated  
848 structures were submitted and are currently available at the Unicarb-DB database link  
849 <https://unicarb-dr.glycosmos.org/references/352>. To compare relative N- and O-glycan  
850 abundance across different samples, each structure was quantified relative to the total  
851 content by integration of the extracted ion chromatogram peak area. Specifically, the area  
852 under the curve (AUC) of the N- / O-glycan structure was normalised to the total AUC and  
853 indicated as a percentage. Analysis of the peak area was processed by Progenesis QI  
854 (Nonlinear Dynamics Ltd, UK).

855

### 856 **nLC-ESI MS/MS label-free proteomic analysis**

857 After digestion and sample preparation, approximately 1.5 µg of peptide per sample was  
858 injected into Ultra-High-Performance Liquid Chromatography (UHPLC) system (Ultimate™  
859 3000 RSLCnano, (Thermo Fisher Scientific, USA) coupled online with Impact HD™ UHR-  
860 QqToF (Bruker Daltonics, Germany). Sample analysis was performed twice to reduce  
861 variability. Sample loading was conducted by using first a pre-column (Dionex, Acclaim  
862 PepMap 100 C18, cartridge, 300 µm), and then a 50 cm nano-column (Dionex, ID  
863 0.075mm, Acclaim PepMap100, C18). Sample separation occurred at 40°C with a flow  
864 rate of 300 nL/min using multistep 4h gradients of ACN, as already reported<sup>74</sup>. The column  
865 was connected to a nanoBoosterCaptiveSpray™ ESI source (Bruker Daltonics, Germany).  
866 Collision-induced Dissociation (CID) fragmentation (N<sub>2</sub> as collision gas) was applied as  
867 data-dependent acquisition mode. Before each sample was run, a specific lock mass  
868 (1221.9906 m/z) and a calibration segment (10 mM sodium formate cluster solution) were  
869 applied to improve mass accuracy. Data was acquired as previously described<sup>75</sup>.

870 DataAnalysis™ v.4.1 Sp4 (Bruker Daltonics, Germany) was used to elaborate data and  
871 protein identities and relative abundancies were determined using Peaks Studio 8.5  
872 (Bioinformatics Solutions Inc., USA)<sup>76</sup>. Each sample was run and analysed as two  
873 independent replicates. For protein identification, Uniprot's reference database of *Ovis*  
874 *aries* was accessed on Feb 2018, 556,825 sequences; 199,652,254 residues. In  
875 particular, the following parameters were set: enzymatic digestion performed by trypsin,  
876 allowing one missed cleavage; precursor mass tolerance was 20 ppm; fragment mass  
877 tolerance of 0.05 Da; carbamidomethylation as fixed modification. False-positive  
878 identification rate (FDR) was set ≤1%, and a peptide score of  $-\log_{10}(\text{p-value}) \geq 20$  was  
879 considered adequate for confident protein identification. De Novo ALC score was set ≥  
880 50%. Relative peptide signal intensity was calculated only for confidently identified peptide

881 features. Then, AUC of each extracted ion chromatogram was calculated and used for the  
882 relative quantification after normalisation Total Ion Current (TIC). Cumulative peak areas of  
883 the proteins were measured by considering only unique peptides assigned to specific  
884 proteins. Only proteins with more than two unique peptides were considered for the  
885 analysis.

886

### 887 **Statistical analysis**

888 The *in vivo* study was designed and powered for statistical significance (power = 0.8), and  
889 this required a minimum of six animals per group. Animals from at least two different  
890 batches of surgeries were analysed for each group in all analyses to avoid a single batch-  
891 dependent bias. Data are presented either as box plots or as the average  $\pm$  standard  
892 deviation (s.d.) and differences with  $P < 0.05$  were considered significant. Statistical  
893 analyses were performed using Prism<sup>®</sup> v9.0.0 (GraphPad Software Inc., USA). Normality  
894 and equality of variance were tested before a statistical test and either Student's *t*-test or  
895 Mann-Whitney *U*-test accordingly used when comparing two groups. Multiple group  
896 analyses were performed by running either Kruskal-Wallis or Tukey's one-way ANOVA  
897 after assessing normality and equality. For RNA-seq analysis, the Wald test was used to  
898 generate p-values and Log2 fold changes as per DEseq2 method. Statistical differences  
899 were defined as \* $P \leq 0.05$ , \*\* $P \leq 0.01$ , \*\*\* $P \leq 0.001$ .

900

### 901 **Data availability**

902 The authors declare that all data supporting the findings of this study are available from  
903 the authors on reasonable request. RNA-seq raw data are publicly available in GEO under  
904 accession code GSE164245. Glycomics-derived annotated structures were deposited in  
905 the Unicarb-DB database (<https://unicarb-dr.glycosmos.org/references/352>).

906

### 907 **Code availability statement**

908 No custom computer code or mathematical algorithm that is deemed central to the  
909 conclusions was used in this study.

910

### 911 **Acknowledgements**

912 The authors acknowledge the use of the Centre for Microscopy and Imaging facilities at  
913 the National University of Ireland Galway. Mass Spectroscopy analysis of glycans was  
914 performed by the Swedish infrastructure for biological mass spectrometry (BioMS)

915 supported by the Swedish Research Council. P. Lalor and E. McDermott from the  
916 Anatomy at the National University of Ireland Galway assisted in processing for TEM  
917 analysis. R. Grigalevičiūtė and A. Kučinskas from the Lithuanian University of Health  
918 Sciences assisted with veterinary procedures and in ensuring animal well-being. Prof. D.H.  
919 Pauza and Dr K. Rysevaite from the Institute of Anatomy at the Lithuanian University of  
920 Health Sciences (Kaunas, Lithuania) assisted with initial processing of tissue samples. The  
921 authors would like to acknowledge A. Sloan and Dr R. Bohara for editorial assistance, M.  
922 Doczyk for assistance in drawing the schematics presented in this article and Dr O. Carroll  
923 for technical help. This manuscript is dedicated to Mimi.

924

### 925 **Funding**

926 This work was funded by the European Commission funding under the AngioMatTrain 7<sup>th</sup>  
927 Framework Programme (Grant Agreement Number 317304) and by the research grant  
928 from Science Foundation Ireland (SFI) co-funded under the European Regional  
929 Development Fund under Grant Number 13/RC/2073 and 13/RC/2073\_P2.

930

### 931 **Author contributions**

932 P.C., M.D.C. and A.P. conceived the idea and designed the experiments. M.D.C., V.V.,  
933 M.R. and P.C. developed and validated the ovine model of MI and performed the *in vivo*  
934 study. P.C. performed the *in vivo* experiments and relative analyses. A.K. and E.E.  
935 assisted in functional data recording and analysis. V.Z. coordinated all veterinary  
936 procedures and animal welfare. A.G.P. assisted with the *in vivo* experiments. P.C. and  
937 R.S. ran analyses on gene expression and proteomic data. C.J. and N.G.K. performed the  
938 PG-LC-ESI-MS/MS glycomic analysis. C.C. and F.M. performed the nLC-ESI-MS/MS  
939 proteomic analysis. S.C. and D.P-G. performed the GAGs analysis. P.C. wrote the  
940 manuscript. M.D.C. edited the manuscript. A.P. supervised the entire project. All authors  
941 read the manuscript, commented on it and approved its content.

942

### 943 **Declaration of Competing Interest**

944 The authors declare no competing financial interests or personal relationships that could  
945 have appeared to influence the work reported in this paper.

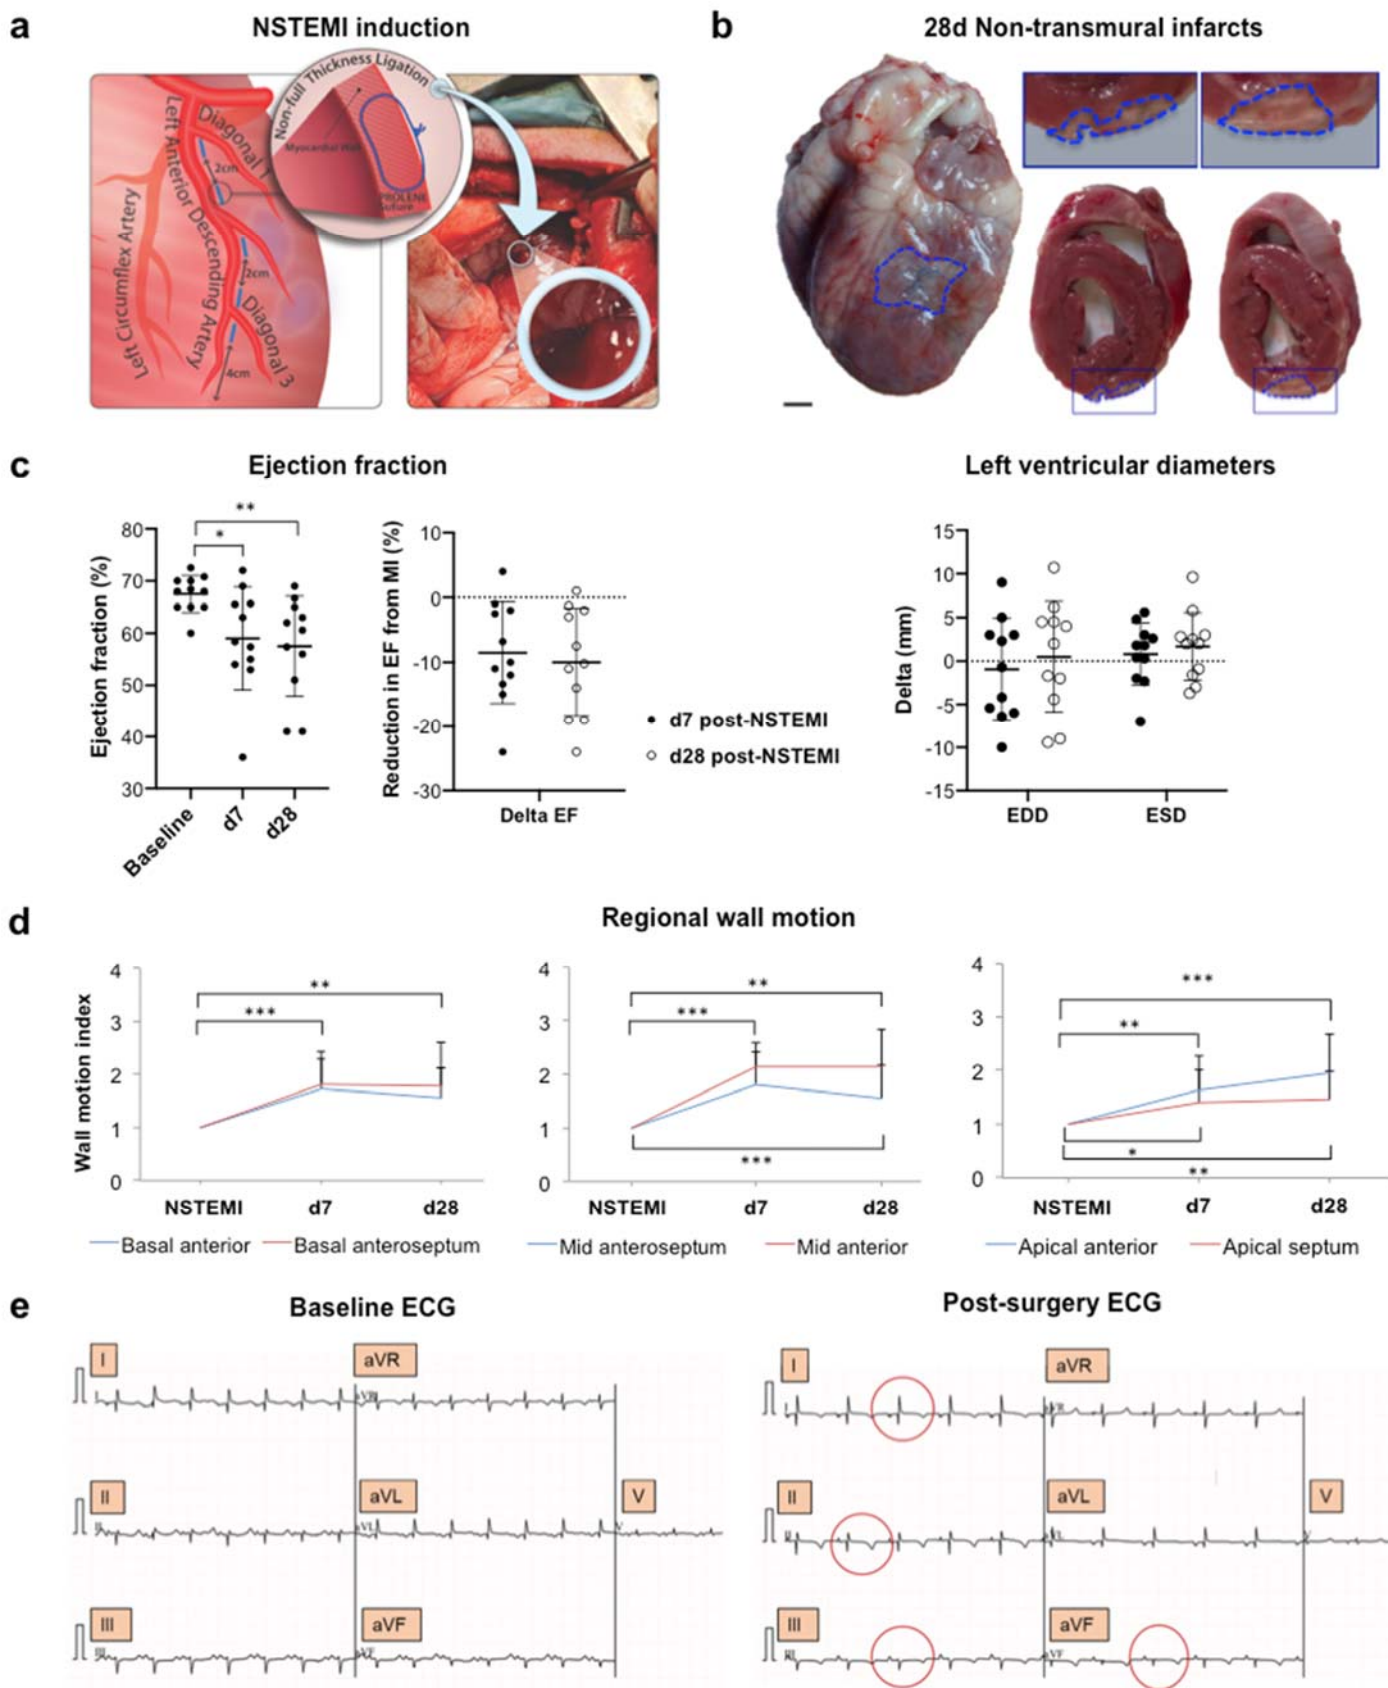

**Figure 1 | Clinically relevant ovine model of NSTEMI**

**a**, Schematics of the multiple ligation procedure to induce NSTEMI infarcts. **b**, Representative photographs of 8-month-old explanted and axially-cut sheep hearts 28 days post-ligation. Blue Prolene sutures were used to track NSTEMI infarcts (framed in blue).  $n=11$  animals. 1-mm ruler spacing. Insets shown at higher magnification above. Scale bar, 1 cm. **c**, Left, ejection fraction (EF) absolute values

before ligation (baseline), 7 (d7) and 28 (d28) days post-ligation and relative decrease in EF on d7 and d28 post- surgery (left). Right, measurement of left ventricular end diastolic (EDD) and systolic (ESD) on d7 and 28 post-ligation.  $n=11$  animals. **d**, Regional wall motion analysis in the main six cardiac segments affected by the induction of NSTEMI by ligation. Wall motion index is shown as mean  $\pm$  s.d at d7 and d28 post-NSTEMI induction.  $n=11$  animals. **e**, Representative electrocardiogram (ECG) before NSTEMI-induction (left) and post-ligation (right). Changes in T wave inversion, in leads I, II, III and aVF are circled in red.  $n=4$  animals. Kruskal-Wallis test in (c), multiple unpaired t-test with Benjamini's method in (d). \* $P<0.05$ , \*\* $P<0.01$ , \*\*\* $P<0.001$ .

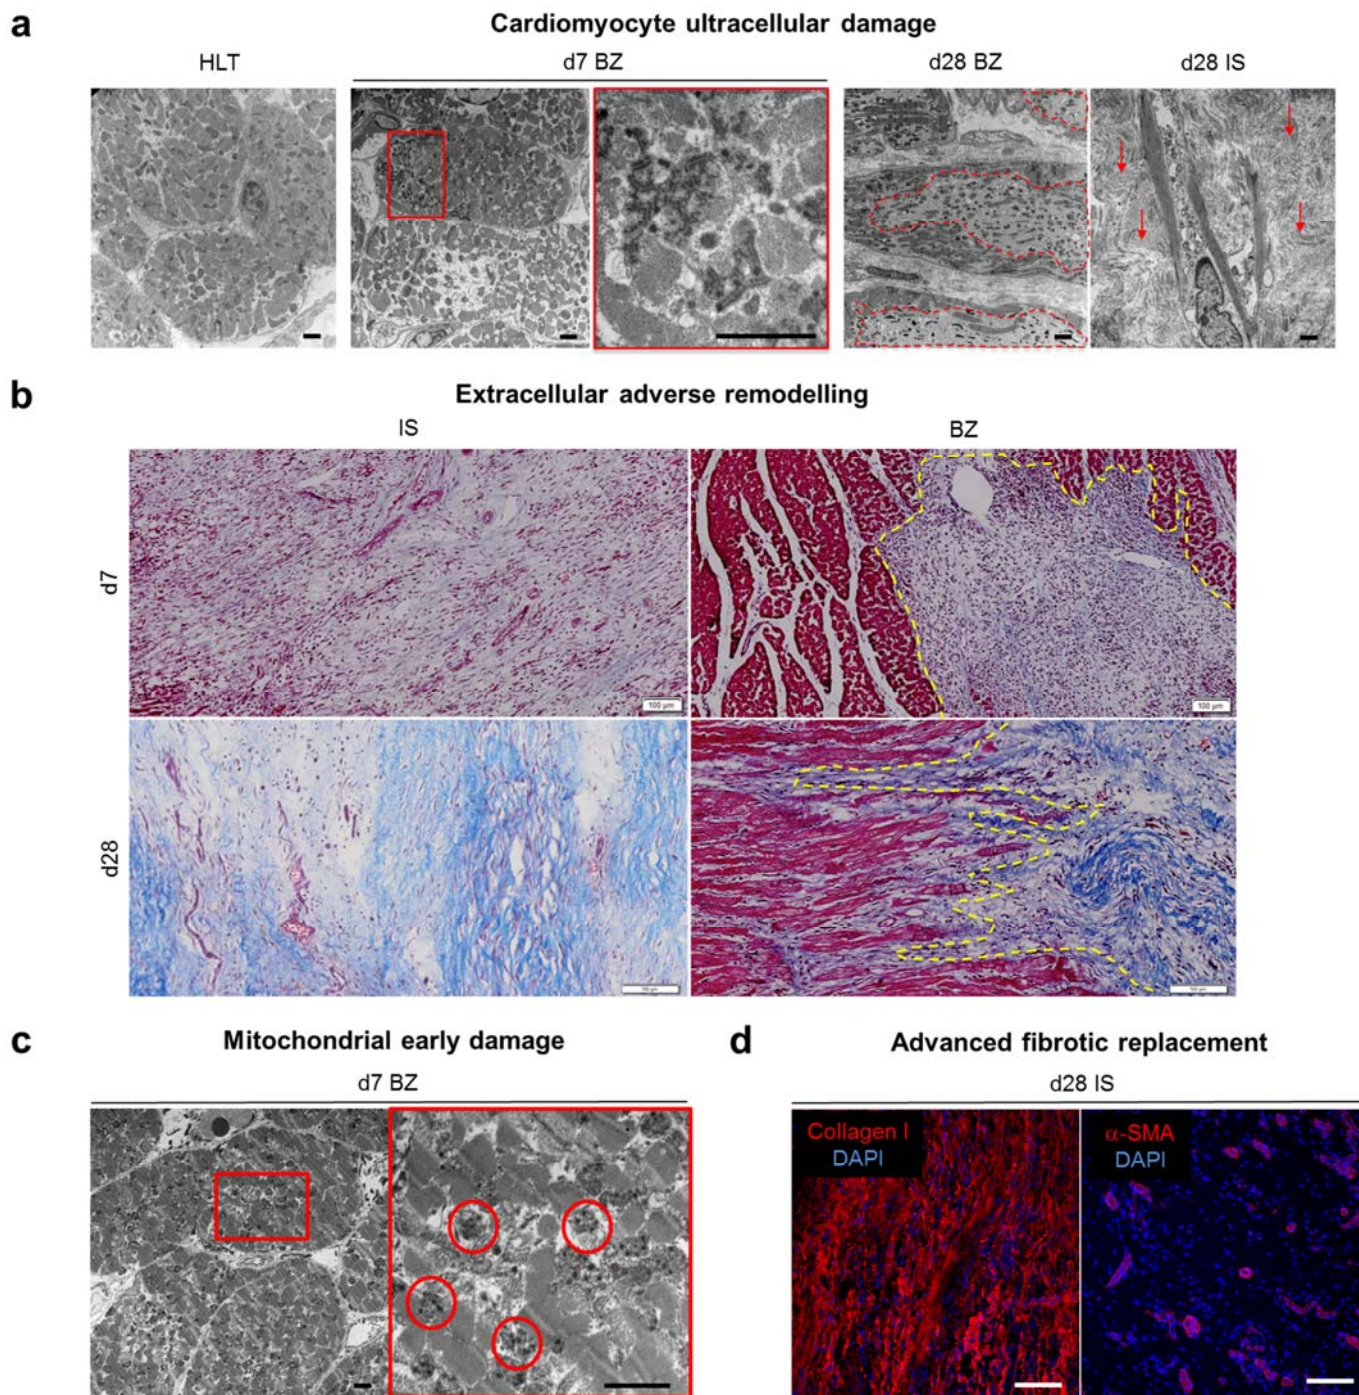

**Figure 2 | Ischaemic cellular damage and extracellular adverse remodelling following NSTEMI**

**a**, Representative TEM micrographs showing ultracellular damage in healthy (HLT) cardiomyocytes (far left) starting from intercalated disks disruption on d7 post-NSTEMI (center), to extended vacuolisation (dashed red line) on d28 post-NSTEMI (right), surrounded by collagen deposition (arrows) by myofibroblasts.  $n=5$  HLT and d7,  $n=7$  d28 animals. Scale bars, 2  $\mu$ m. **b**, Representative Masson's Trichrome staining of ischemic core (IS) and border zone (BZ) regions of NSTEMI infarcted tissues on d7 and d28.  $n=5$  animals per group. Scale bars, 100  $\mu$ m. **c**, Representative TEM micrographs of mitochondria in cardiomyocytes located in the BZ of the infarct. Inset shows accumulation of dense bodies (circled in red) on d7 post-NSTEMI.  $n=5$  animals. Scale bars, 2  $\mu$ m. **d**, Immunofluorescence microscopy of collagen fibrotic replacement (left) and sparse  $\alpha$ -SMA<sup>+</sup> arterioles (right) in IS on d28.  $n=5$  animals. Scale bars, 20  $\mu$ m.

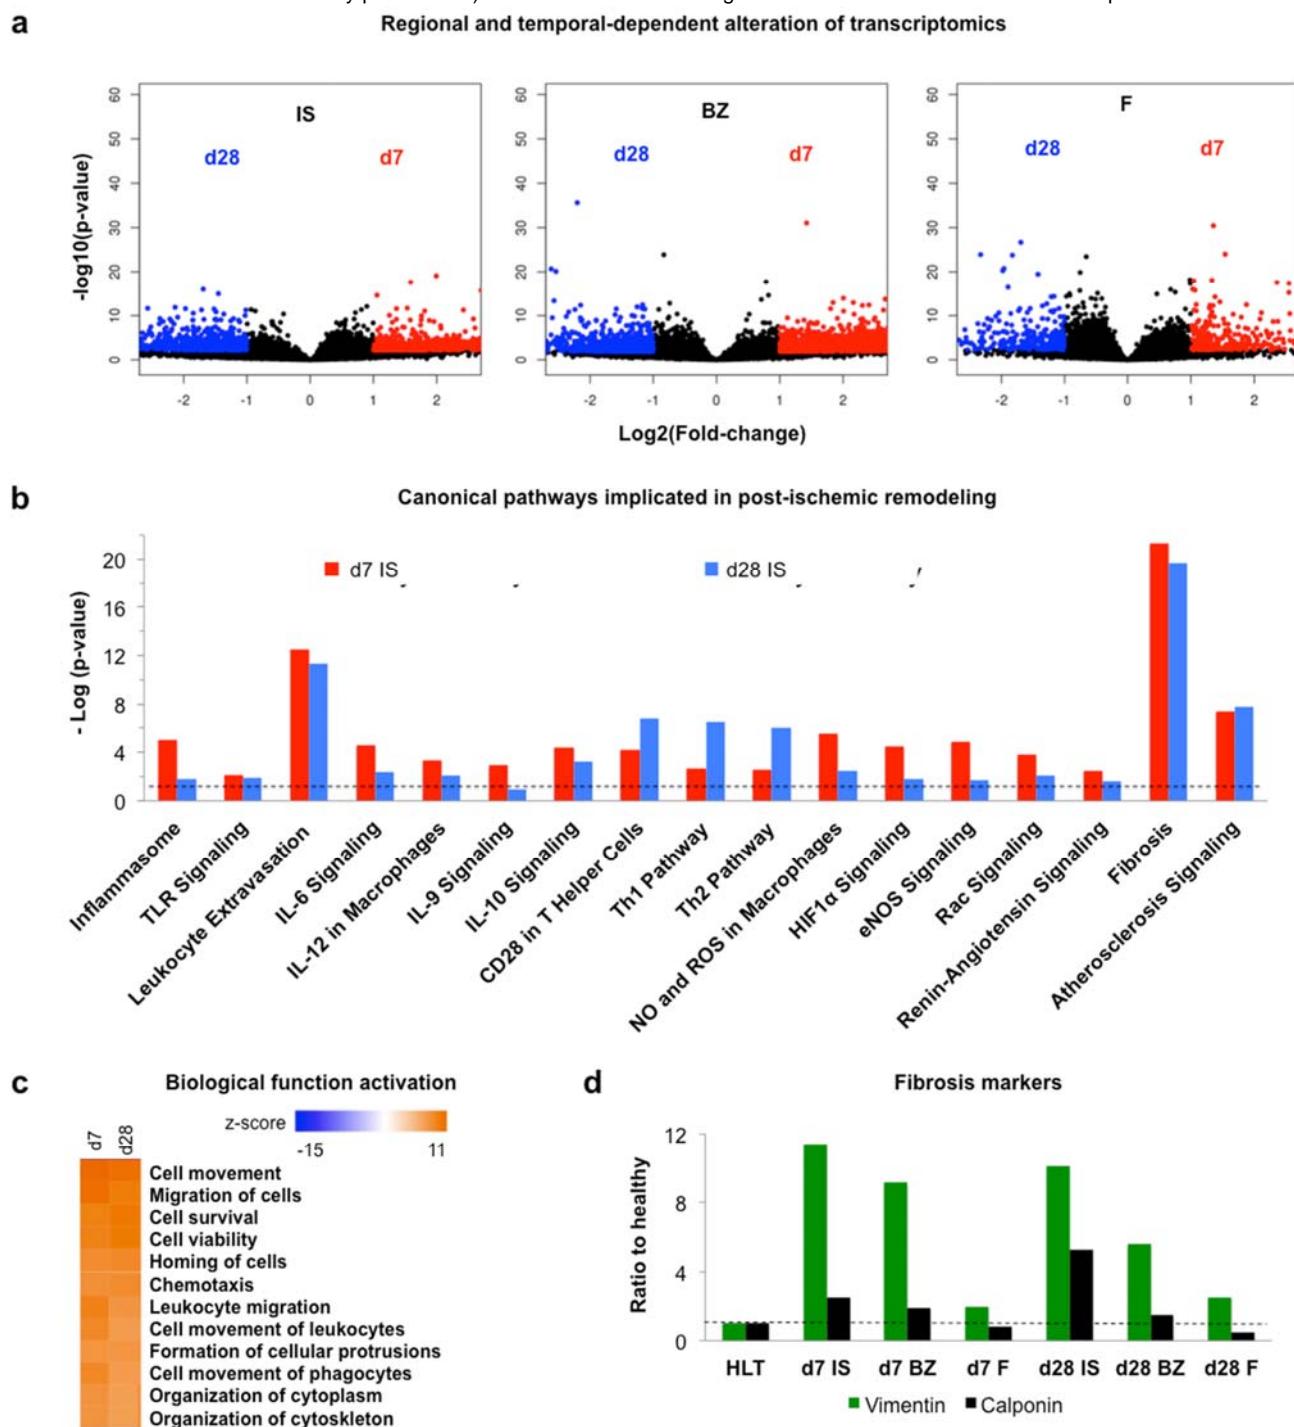

**Figure 3 | Post-ischaemic pathways alteration following NSTEMI**

**a**, Volcano plots showing the total genes significantly upregulated ( $\log_2(\text{fold change}) > 1.5$ ) between the core ischaemic (IS), border (BZ) and remote (F) regions sampled at d7 and d28 post-NSTEMI.  $n=4$  animals per group. **b**, Significant canonical pathways resulting from differentially expressed genes (DEG) data from RNA sequencing (analysed by IPA®). Cut-offs of  $\log_2(\text{fold change}) > 1.5$  and  $\log_2(\text{fold change}) < -1.5$  and adjusted- $P < 0.05$  were set. Dashed line shows a threshold of  $-\text{Log}(p\text{-value})$  of 1.3, corresponding to  $P=0.05$ . All DEG data were normalised to healthy baseline left ventricular samples.  $n=4$  animals per group. **c**, Main activated biological functions listed by highest z-score from IPA® analysis on RNA-seq data from IS samples on d7 and d28 post-NSTEMI.  $n=4$  animals per group. **d**, Expression levels of myofibroblast-related markers vimentin and calponin 1 as detected by nLC-ESI-MS/MS analysis on IS samples. Each analysed sample was a pool of samples coming from three animals.



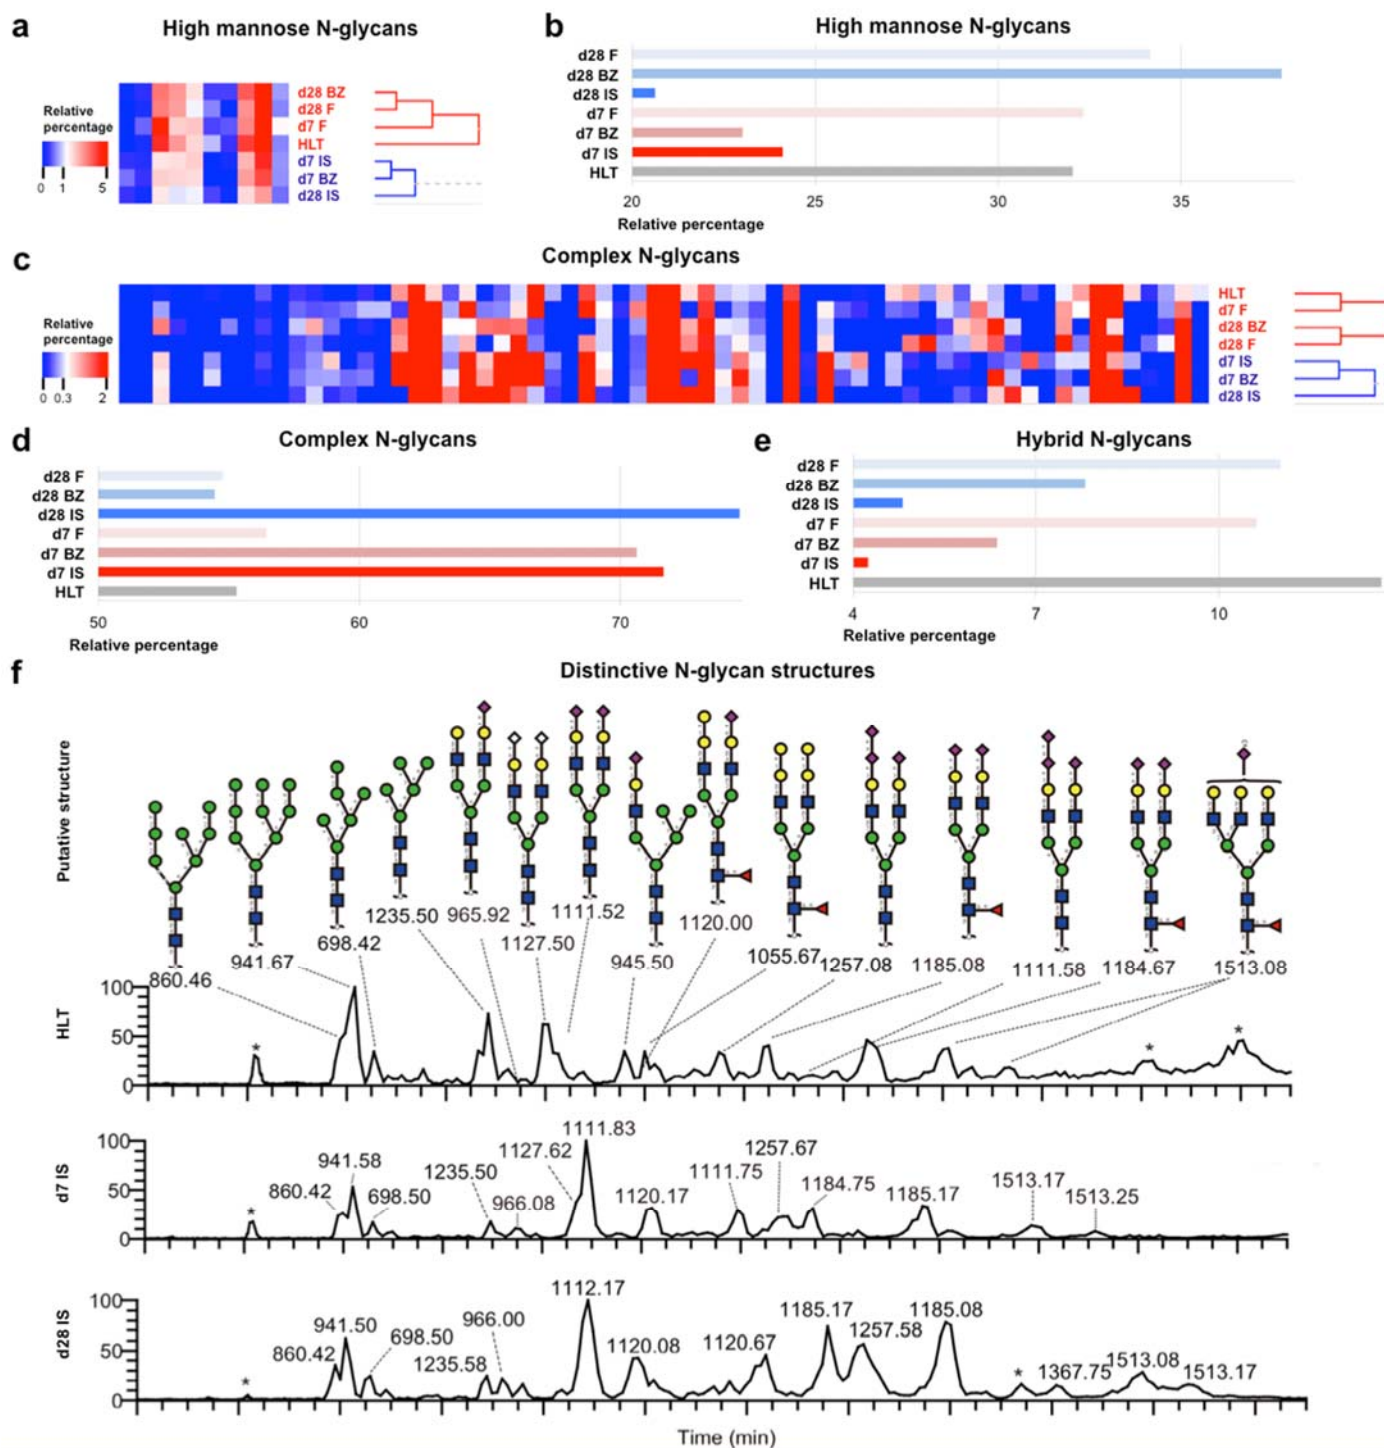

**Figure 4 | Distinct glycoprofile in the infarcted heart following NSTEMI**

**a**, 10 high mannose N-glycans putative structures detected by PG-LC-ESI-MS/MS and analysed by hierarchical clustering. **b**, Relative percentage of high mannose among total N-glycans putative structures across healthy and infarcted myocardial membrane cellular samples at d7 and d28 post-NSTEMI. **c**, 78 complex N-glycans putative structures detected by PG-LC-ESI-MS/MS and analysed by hierarchical clustering. **d,e** Relative percentage of complex (**d**) and hybrid (**e**) among total N-glycans putative structures across healthy (HLT) and infarcted myocardial membrane cellular samples at d7 and d28 post-NSTEMI. **f**, Extracted ion chromatography (EIC) showing N-linked glycans mainly expressed in the membrane protein extracts from HLT myocardium and IS at d7 and d28 post-NSTEMI. Regions of infarcted hearts are labelled as follows: IS= core ischaemic, BZ = border zone, F = remote zone from the

infarct. Data are representative of two independent experiments. Each analysed sample was a pool of samples coming from three individuals per group and region and analysed by PG-LC-ESI-MS/MS.

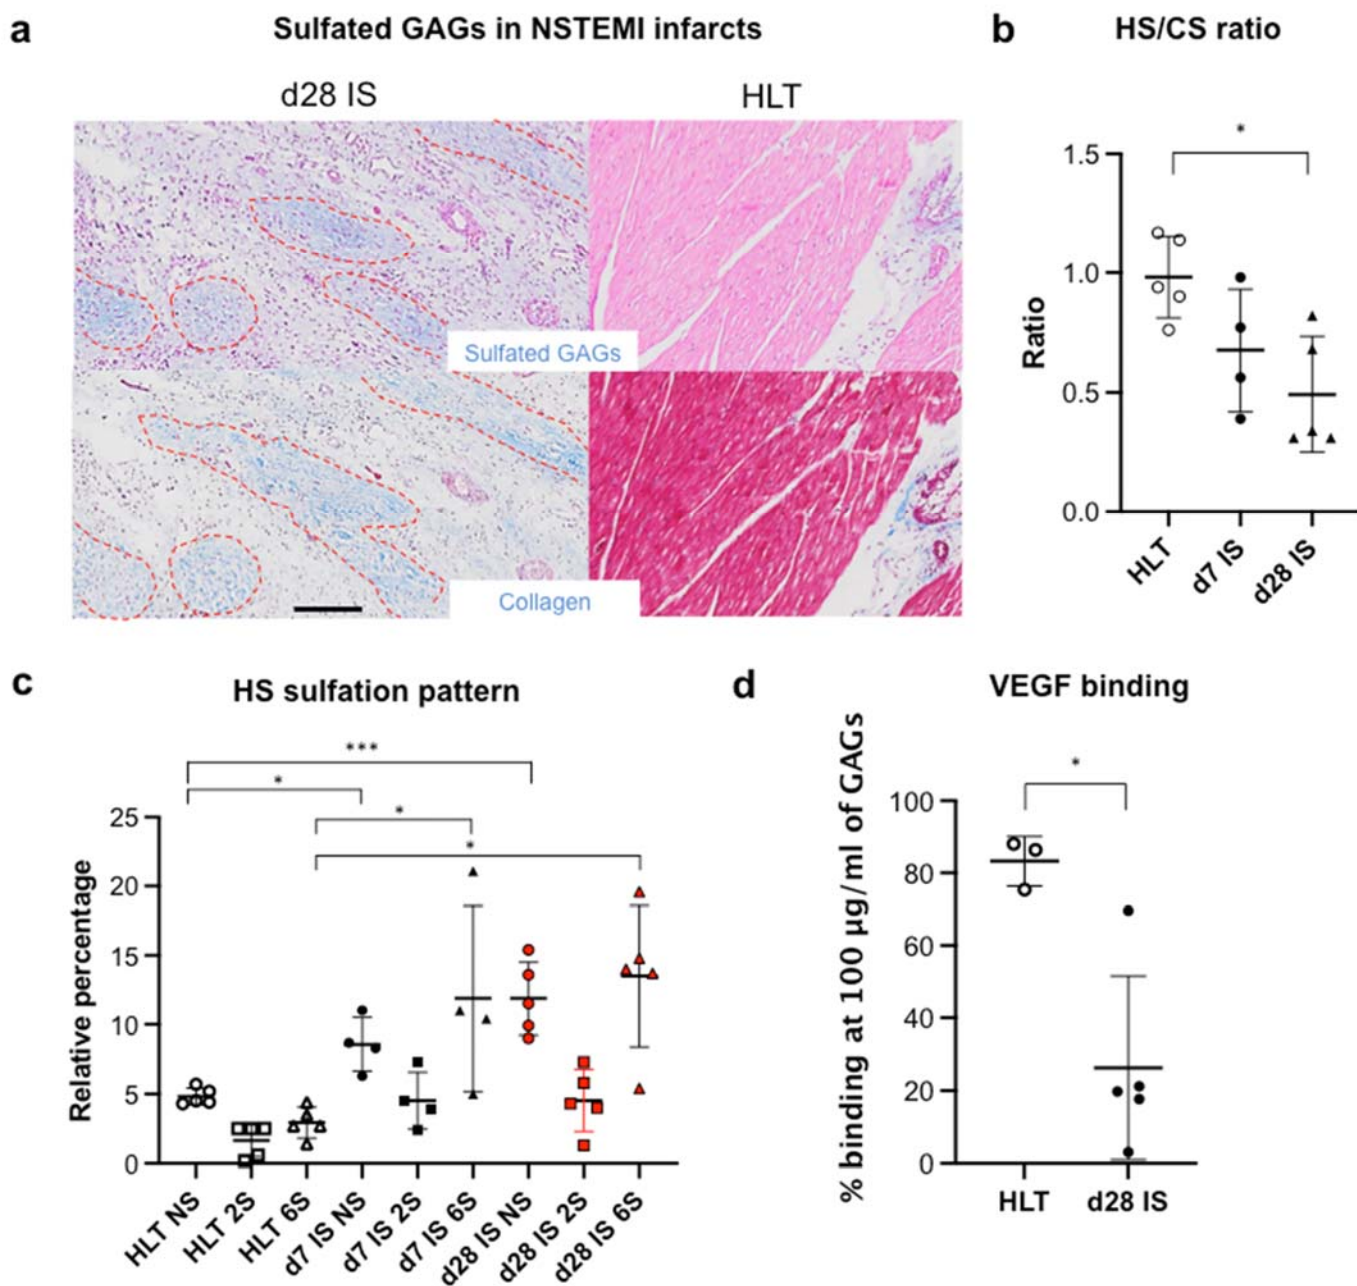

**Figure 5 | An irreversibly-altered extracellular matrix shows specific changes in the HS sulfation pattern following NSTEMI**

**a**, Representative Alcian Blue (top) and Masson's Trichrome (bottom) stainings to show sulfated glycosaminoglycans (GAGs) and collagen (dashed in red) in ischaemic core (IS) regions of NSTEMI infarcts on d28 post-NSTEMI.  $n=5$  animals per group. **b**, Quantification of heparan sulfate (HS) to chondroitin sulfate (CS) ratio in GAGs extracted from tissue.  $n=4$  animals at d7 and  $n=5$  healthy (HLT) and d28 post-NSTEMI. **c**, Relative percentage of NS, 2S and 6S sulfation in extracted HS across the healthy (HLT) and IS samples at d7 and d28 post-NSTEMI.  $n=5$  HLT,  $n=4$  at d7 and  $n=5$  at d28 post-NSTEMI. **d**, VEGF binding capacity of extracted total GAGs (at 100 µg/ml) across the HLT and IS samples at d28 post-NSTEMI.  $n=3$  HLT and  $n=5$  animals at d28 post-NSTEMI. Kruskal-Wallis test in **(b,c)**, Mann-Whitney test in **d**. \* $P<0.05$ , \*\*\* $P<0.001$ .

**a**

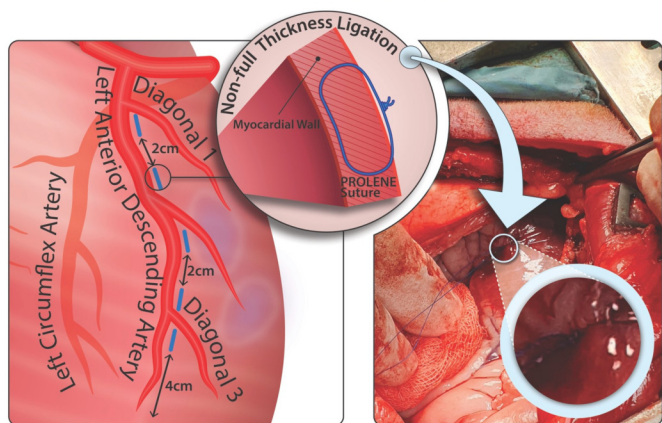

**b**

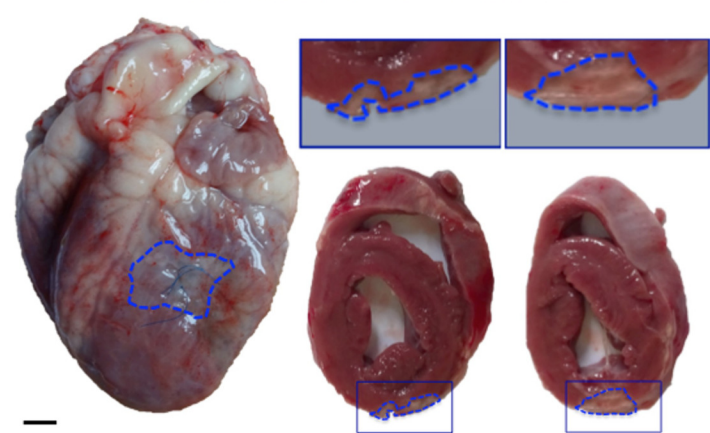

**c**

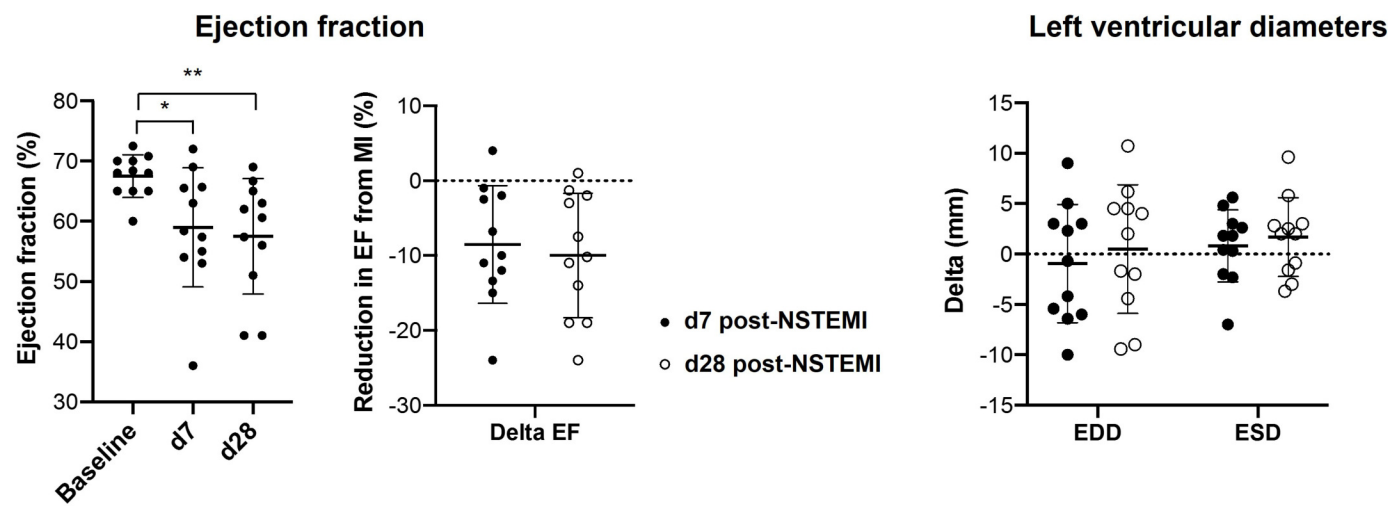

**d**

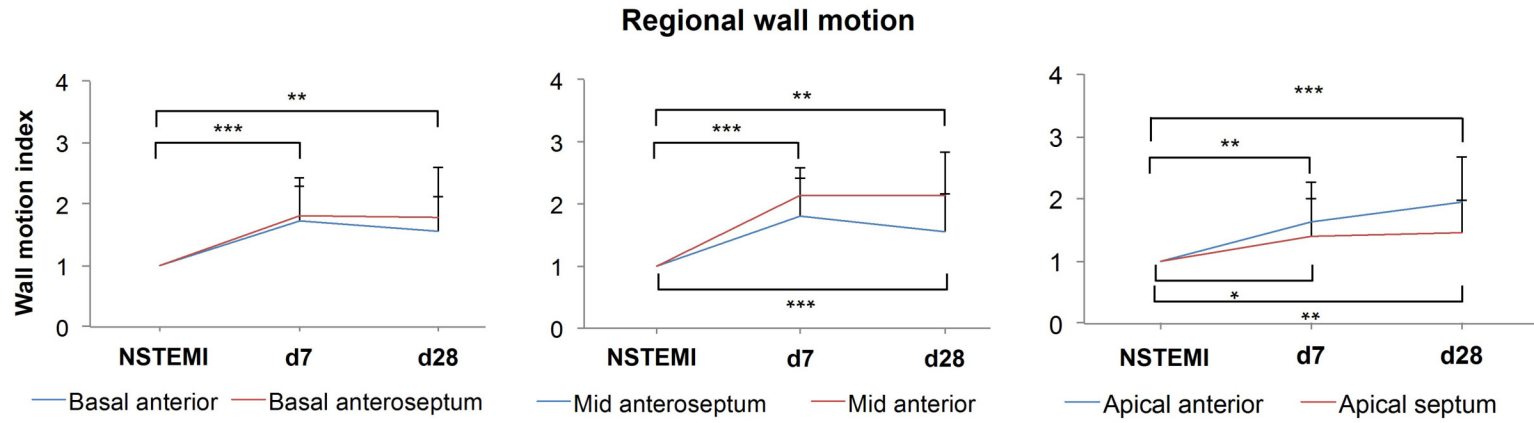

**e**

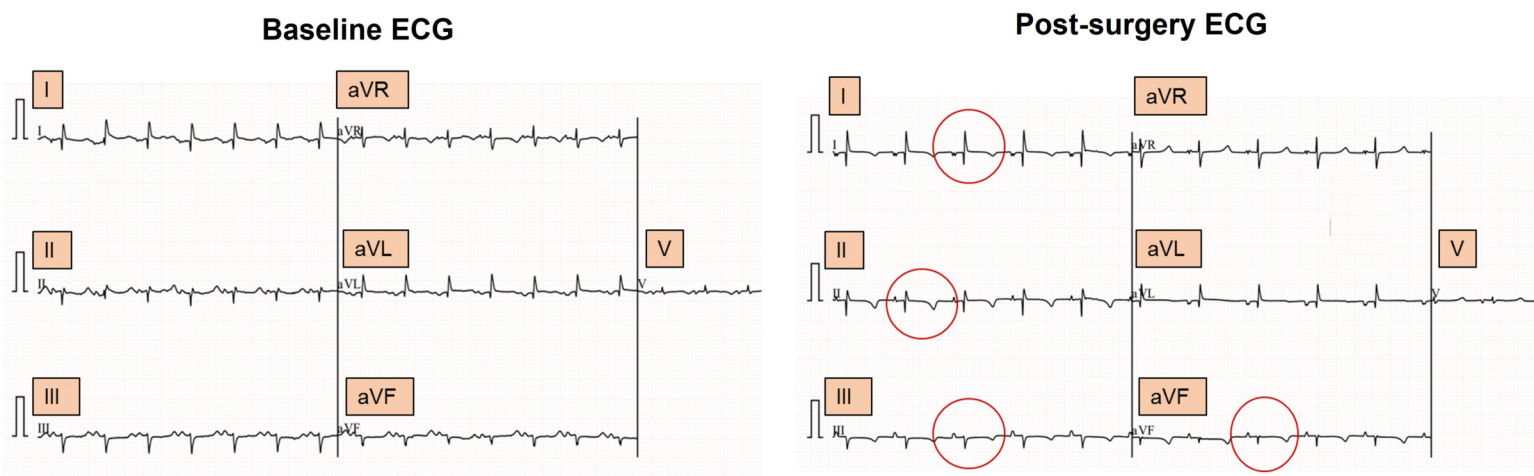

Figure 1 Contessotto *et al.*

**a**

**Cardiomyocyte ultracellular damage**

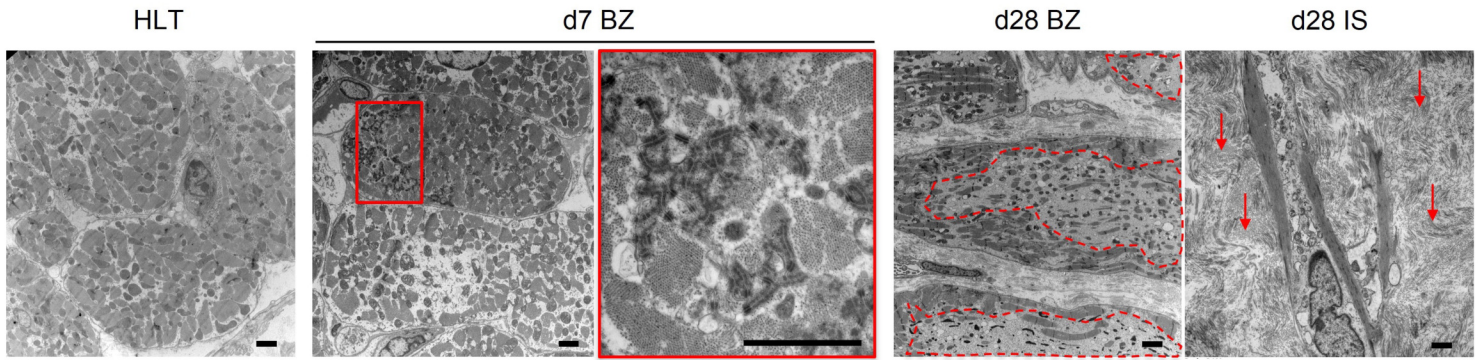

**b**

**Extracellular adverse remodelling**

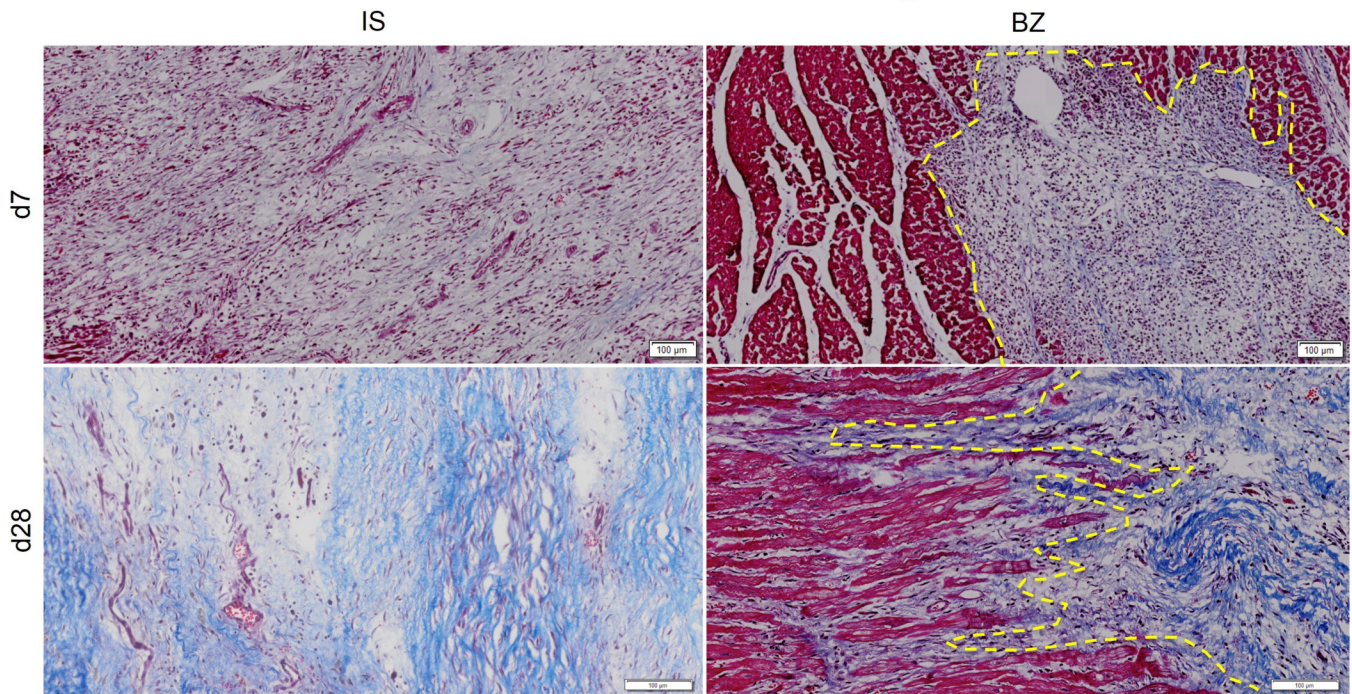

**c**

**Mitochondrial early damage**

d7 BZ

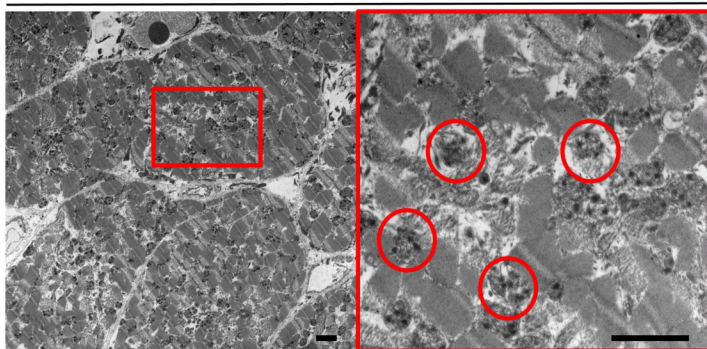

**d**

**Advanced fibrotic replacement**

d28 IS

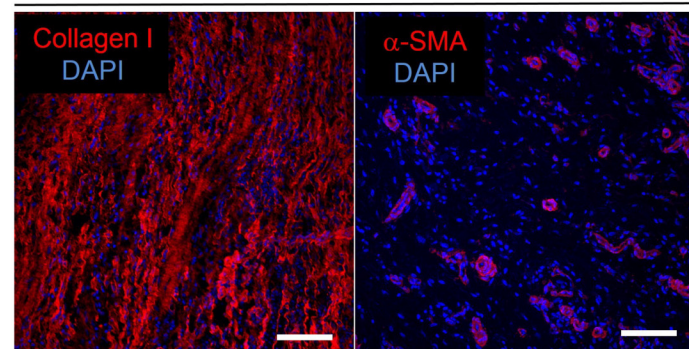

Figure 2 Contessotto *et al.*

**a**

**Regional and temporal-dependent alteration of transcriptomics**

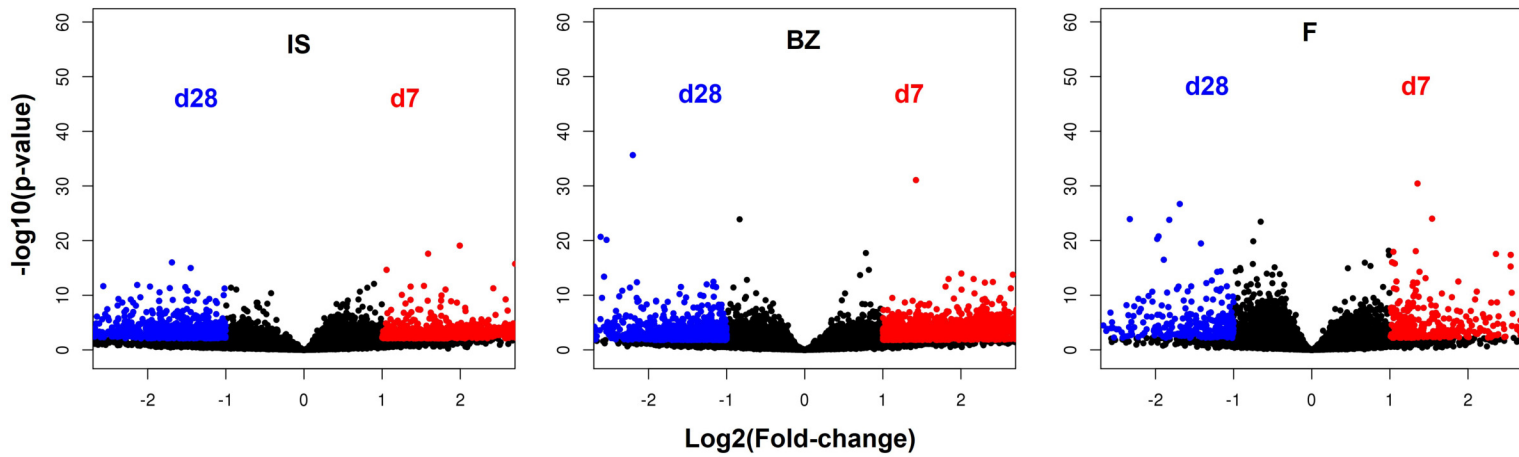

**b**

**Canonical pathways implicated in post-ischemic remodeling**

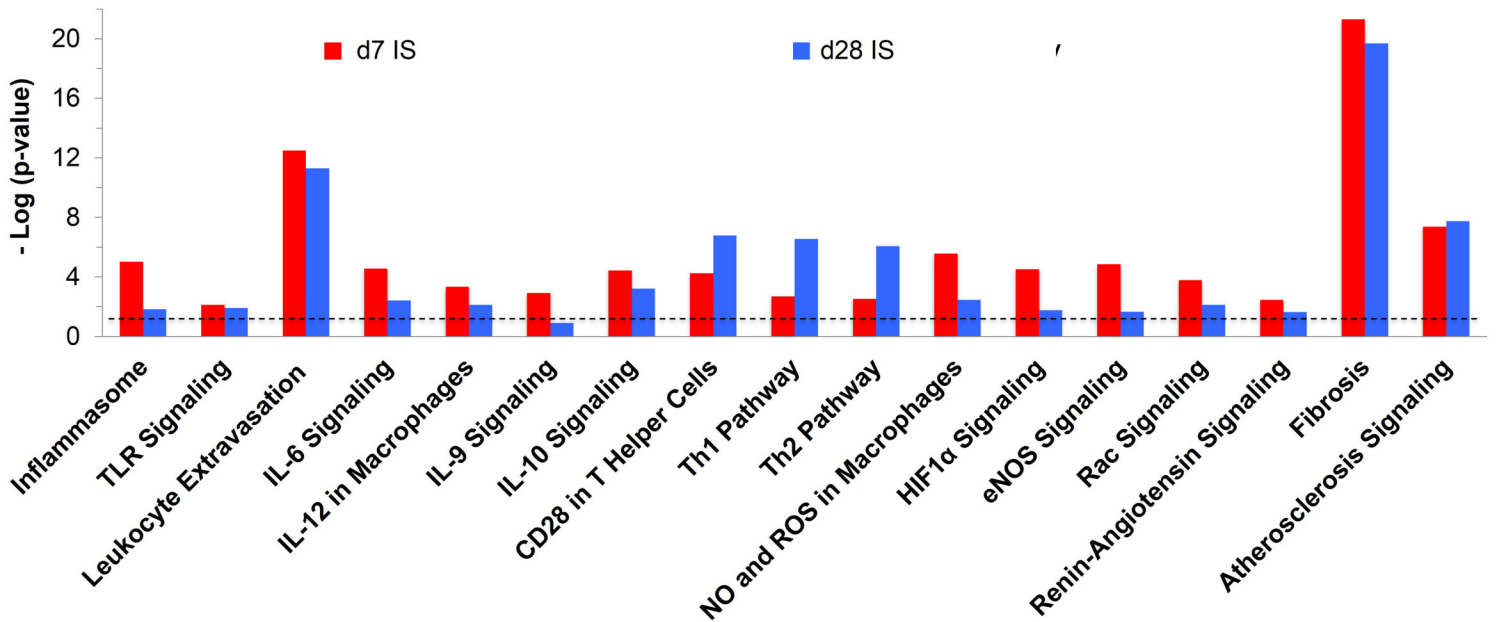

**c**

**Biological function activation**

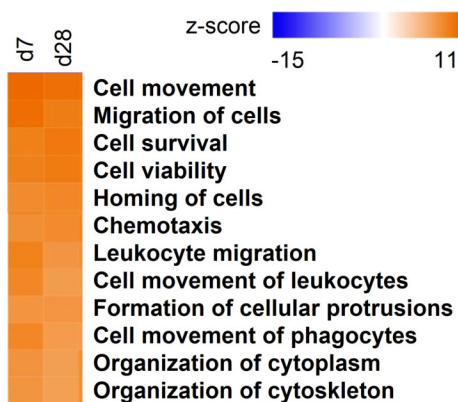

**d**

**Fibrosis markers**

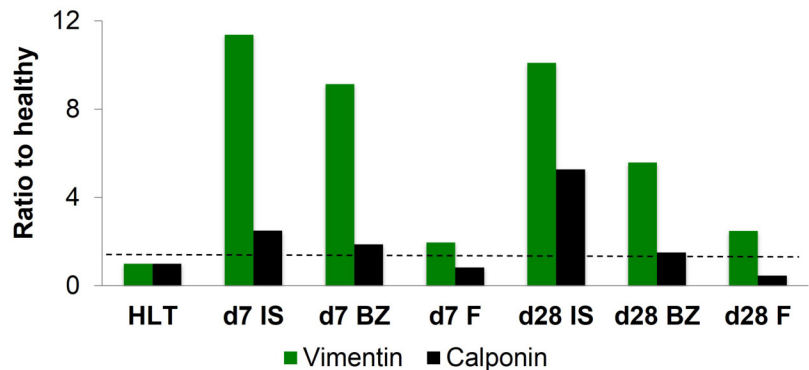

Figure 3 Contessotto *et al.*

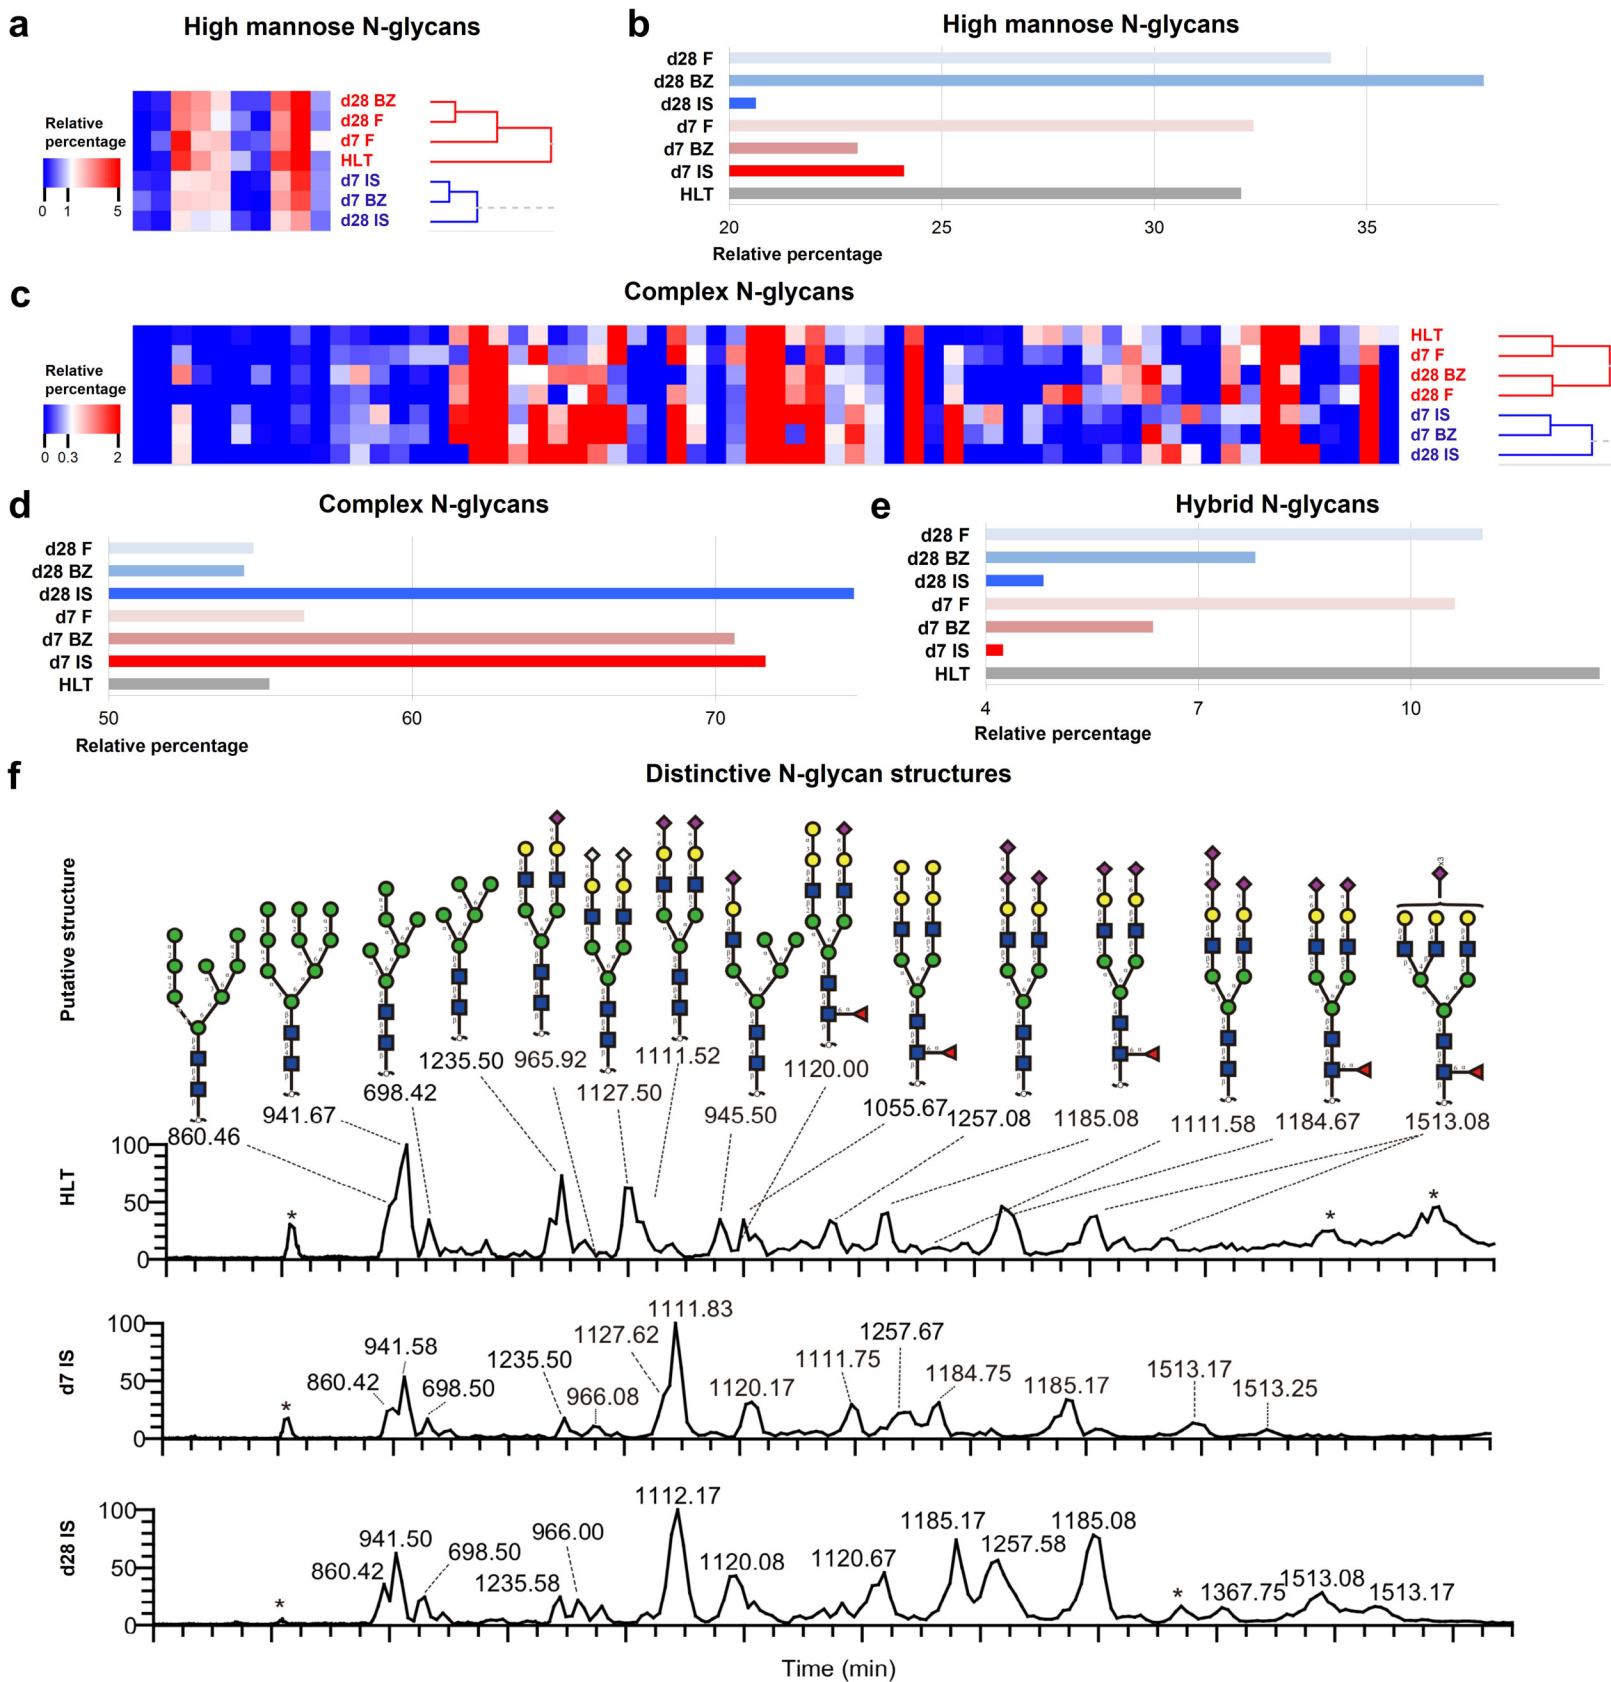

Figure 4 Contessotto *et al.*
